# Supplementary material for: Climate change effect on the widely distributed Palearctic plant bug species (Insecta: Heteroptera: Miridae)
Source: PeerJ. 2024 Nov 22;12:e18377. doi: 10.7717/peerj.18377 (PMC11587874; doi:10.7717/peerj.18377)
Supplement: Supplemental Information 1 — Data SI1: Locality and collection event data for the Liocoris tripistulatus, Lygocoris pabulinus and Lygus punctatus used for the ecological niche modelling, PCA, and logistic regression. Data SI2. Pearson’s correlations of the variables. The high correlations (<90%) are highlighted in red. Data SI3. Areas calculated from the geographic projections of the ecological niche models for each species, dataset, and climate model (km2). [file peerj-12-18377-s001.xlsx]

## Sheet: Title
Climate change effect on the widely distributed Palearctic plant bug species (Insecta: Heteroptera: Miridae)
Anna A. Namyatova1,2,*, Polina A. Dzhelali1,2, Veronica D. Tyts1,2, Alexander A. Popkov3
1Laboratory of Phytosanitary Diagnostics and Forecasts, All-Russian Institute of Plant Protection, St Petersburg, Russia.
2Laboratory of Insects Taxonomy, Zoological Institute of Russian Academy of Sciences, St Petersburg, Russia
3Independent researcher, St Petersburg, Russia
*corresponding author
ORCID: Anna A. Namyatova 0000-0001-9678-3430; Polina A. Dzhelali 0000-0002-0741-3655; Veronica D. Tyts 0000-0001-5574-5024; Alexander Popkov N/A

## Sheet: DataSI1 Liocoris tripustulatus 
Data SI1. Raw locality and collection event data for the Liocoris tripustulatus used for the ecological niche modelling, PCA and linear modelling analyses
Latitude	Longitude	Country	Province	Locality	Collector	Date	Genbank accession number, iNaturalist link or reference
43.61235	-7.589813	Spain		Lugo		14 Jul 2021	https://www.inaturalist.org/observations/88263873
43.30485	-2.904473	Spain		Sondika		24 Aug 2018	https://www.inaturalist.org/observations/82236113
43.332617	-5.923744	Spain		Priorio, Oviedo		26 Aug 2020	https://www.inaturalist.org/observations/57654835
40.651535	-7.374659	Portugal		6360 Celorico da Beira		27 May 2023	https://www.inaturalist.org/observations/164391641
40.655953	-7.934587	Portugal		Viseu		21 Aug 2021	https://www.inaturalist.org/observations/92007918
37.331493	-8.568151	Portugal		Monchique, 8550		02 Apr 2023	https://www.inaturalist.org/observations/153384914
41.258425	0.932171	Spain		43362 Siurana, Tarragona		07 May 2022	https://www.inaturalist.org/observations/115947881
40.755567	-4.024858	Spain		Cercedilla		09 Jun 2021	https://www.inaturalist.org/observations/82243029
47.6072222	14.7311111	Austria		Kalktal, W Hieflau		no date provided	Friess, 2014
42.493951	1.492486	Andorra		Roc de Sant Vicenc		Sep 1992	Gesse et al., 1994
35.326389	24.510278	Greece		Crete, Rethimnon Promonastiri		18 May 2011	Heckmann et al., 2015
35.218611	25.174722	Greece		Crete, Archanes Katalagari		06-17 May 2011	Heckmann et al., 2015
49.139444	18.061667	Czechia		Poteč, Plošèiny		1998–2011	Kment & Banar, 2011
48.946111	17.567778	Czechia		Boršice u Blatnice, Boršický potok brook valley		1998–2011	Kment & Banar, 2011
48.832778	17.386944	Czechia		Radìjov, Žerotín		1998–2011	Kment & Banar, 2011
46.776275	17.373215	Hungary		Balatongyörök		1999-2003	Kondorosy, 2011
46.51778	16.94918	Hungary		Hosszúvölgy		1989-1991	Kondorosy, 2011
46.118173	17.938811	Hungary		Gyűrűfű		2006-2008	Kondorosy, 2009
50.121958	19.251473	Poland		Chełmek		no date provided	Lis & Lis, 1998
49.726553	18.824283	Poland		Lipowiec		no date provided	Lis & Lis, 1998
50.464341	18.818917	Poland		Tarnowskie Góry		no date provided	Lis & Lis, 1998
50.630998	19.383575	Poland		Żarki		no date provided	Lis & Lis, 1998
44.612765	38.073161	Russia	Krasnodarsky Terr.	Gelendzhik		07 Sep 2001	Neimorovets, 2010
43.741762	39.683182	Russia	Krasnodarsky Terr.	Tretya Rota		06 Jun 2002	Neimorovets, 2010
43.630583	40.285339	Russia	Krasnodarsky Terr.	south slope of Aibga		30 Aug 2001	Neimorovets, 2010
54.7272789	43.1515892	Russia	Mordovia Rep.	Mordovski Nature Reserve, kordon Inorsky		12 Aug 2014	Nikolaeva, 2015
55.473015	40.393987	Russia	Vladimir Prov.	National Park "Meschyora"		2002-2004	Nikolaeva, 2011
53.67358	-1.480749	United Kingdom		Wakefield		01 Aug 2021	https://www.inaturalist.org/observations/93385893
52.000017	-5.047165	United Kingdom		Stones Cottages Llandruidion, Goodwick SA64 0J		14 May 2022	https://www.inaturalist.org/observations/116990597
55.576555	-1.656703	United Kingdom		Northumberland Coast AONB, Seahouses		24 May 2021	https://www.inaturalist.org/observations/80114544
52.965479	-6.014987	Ireland		Dunbur Head, Co. Wicklow		26 Aug 2020	https://www.inaturalist.org/observations/57665014
50.170261	-5.103076	United Kingdom		Penryn, UK		26 Apr 2021	https://www.inaturalist.org/observations/75316243
38.164694	14.930291	Italy		Provincia di Messina		28 Jul 2021	https://www.inaturalist.org/observations/89029999
41.996284	14.992668	Italy		Termoli CB		14 Jun 2022	https://www.inaturalist.org/observations/121763594
37.936672	22.860537	Greece		Λέχαιο 200 11, Ελλάδα		21 Jul 2022	https://www.inaturalist.org/observations/131905071
43.711563	7.283148	France		Pasteur, Nice		23 May 2022	https://www.inaturalist.org/observations/128285749
47.148132	9.836184	Austria		Bludenz		22 Jun 2022	https://www.inaturalist.org/observations/123599934
48.842339	2.325851	France		Île-de-France		Aug 2022	https://www.inaturalist.org/observations/141489250
47.233947	9.669425	Austria		Außerbergweg, Satteins, Vorarlberg, AT		04 Sep 2022	https://www.inaturalist.org/observations/133812675
55.724505	8.685425	Danmark		Hoddeskovvej, Ansager, Region Syddanmark, DK		05 Jun 2023	https://www.inaturalist.org/observations/165757534
57.693437	11.963166	Sweden		Annedal, Göteborg, Sverige		23 Jul 2021	https://www.inaturalist.org/observations/102439745
59.304492	10.977137	Norway		Fredrikstad Municipality, Norway		16 May 2022	https://www.inaturalist.org/observations/117316762
60.199734	5.623763	Norway		Gjerdevegen 12, 5641 Fusa, Norge		1 May 2022	https://www.inaturalist.org/observations/115926733
57.712518	11.938014	Sweden		Brämaregården, Göteborg, Sverige		14 Sep 2020	https://www.inaturalist.org/observations/72975050
59.176306	16.761443	Sweden		Malmköping		02 May 2020	https://www.inaturalist.org/observations/44614162
56.265592	13.508831	Sweden		Hässleholm, SE-SN, SE		16 Oct 2021	https://www.inaturalist.org/observations/98358921
64.866116	25.485895	Finland		North Ostrobothnia, FI-OU, FI		10 Jun 2023	https://www.inaturalist.org/observations/166636080
60.745415	21.756152	Finland		Appuljärvi, Vehmaa, Suomi		27 Jun 2021	https://www.inaturalist.org/observations/84825126
60.144664	24.982794	Finland		Suomenlinna, Helsinki		23 Jun 2015	https://www.inaturalist.org/observations/148623975
62.595351	29.754466	Finland		Kirkkokatu, Joensuu, Pohjois-Karjala		23 Jun 2022	https://www.inaturalist.org/observations/123132905
64.778721	25.034136	Finland		North Ostrobothnia, FI-OU		May 2023	https://www.inaturalist.org/observations/163101726
64.669166	40.539595	Russia	Arkhangelsk Prov.	Maimaksan District, Arkhangelsk		21 May 2012	https://www.inaturalist.org/observations/32518117
57.306873	10.013215	Danmark		9700 Brønderslev		27 Mar 2023	https://www.inaturalist.org/observations/152532850
56.574967	10.185834	Danmark		Udbyhøjvej, Gjerlev J, Region Midtjylland, DK		28 Jun 2022	https://www.inaturalist.org/observations/123830456
56.242062	9.870401	Danmark		Hammel Hundeskov		15 Jun 2022	https://www.inaturalist.org/observations/121887200
54.896075	9.827436	Danmark		6400 Sønderborg		28 May 2022	https://www.inaturalist.org/observations/119190341
53.686088	10.014382	Germany		Norderstedt		14 May 2021	https://www.inaturalist.org/observations/78962688
53.225312	9.783258	Germany		Klein Todtshorn		01 Jul 2022	https://www.inaturalist.org/observations/124249603
53.108002	8.842968	Germany		Bremen-Ost, Bremen		10 Jun 2023	https://www.inaturalist.org/observations/166927817
51.530148	9.94842	Germany		Hilbert-Str		27 May 2023	https://www.inaturalist.org/observations/165273492
51.562212	8.844645	Germany		Kloster Dalheim, 33165 Lichtenau		14 Jun 2020	https://www.inaturalist.org/observations/49827606
53.221002	8.107288	Germany		Mansholter Holz, 26215 Wiefelstede		23 Apr 2007	https://www.inaturalist.org/observations/124081379
51.213718	9.805054	Germany		Hessen		Aug 2020	https://www.inaturalist.org/observations/57125944
52.455722	13.150549	Germany		Berlin		28 May 2023	https://www.inaturalist.org/observations/164483132
50.981783	11.315201	Germany		Brahmsstraße, Weimar, Thüringen, DE		14 Jun 2022	https://www.inaturalist.org/observations/121754844
49.750947	11.445637	Germany		Naturpark Fränkische Schweiz – Frankenjura, Pottenstein, Bayern, DE		08 Jul 2022	https://www.inaturalist.org/observations/125288643
51.330698	12.369752	Germany		Lampestraße, Leipzig, Sachsen, DE		30 Jun 2021	https://www.inaturalist.org/observations/85138616
51.061848	13.762358	Germany		Holzhofgasse, Dresden, Sachsen, DE		20 Aug 2021	https://www.inaturalist.org/observations/91937859
50.103706	8.774131	Germany		63065 Offenbach am Main, Deutschland		20 Jun 2023	https://www.inaturalist.org/observations/168699054
48.744653	9.249401	Germany		Hedelfingen, Stuttgart, Allemagne		29 Apr 2023	https://www.inaturalist.org/observations/158247136
47.529744	8.345818	Germany		Himmelrich, Lengnau AG, Aargau, CH		28 May 2022	https://www.inaturalist.org/observations/119037428
45.69106	9.452351	Italy		23899 Robbiate LC		09 Jul 2021	https://www.inaturalist.org/observations/86314007
45.322407	7.903896	Italy		Torino, Piemonte		6 Mar 2020	https://www.inaturalist.org/observations/39608102
43.281808	5.349261	France		Endoume, Marseille		25 Jun 2020	https://www.inaturalist.org/observations/50870573
43.455036	3.755127	France		Villa Dora, 34110 Frontignan		11 Jun 2017	https://www.inaturalist.org/observations/105794691
43.656105	1.478278	France		43 Avenue de Toulouse, L'Union, Midi-Pyrénées		18 Jun 2016	https://www.inaturalist.org/observations/13747522
45.68202	4.68365	France		Chemin de la Moinière, Soucieu-en-Jarrest, Auvergne-Rhône-Alpes		09 Aug 2022	https://www.inaturalist.org/observations/130084638
48.349871	4.053136	France		10150 Sainte-Maure		1 Jun 2023	https://www.inaturalist.org/observations/167871397
48.580595	-1.97315	France		35430 Saint-Suliac		07 Apr 2023	https://www.inaturalist.org/observations/153841870
49.650058	-1.61327	France		Port de Cherbourg, Cherbourg-en-Cotentin		09 Apr 2023	https://www.inaturalist.org/observations/154093056
48.597305	-2.037251	France		étangs 35730 Pleurtuit		17 Jul 2021	https://www.inaturalist.org/observations/145059979
48.887687	2.399372	France		Paris		05 Jun 2023	https://www.inaturalist.org/observations/165731169
46.991387	7.469842	Switzerland		Länggasse, Ittigen, Bern, CH		19 Jul 2022	https://www.inaturalist.org/observations/126955424
45.553863	6.074002	France		73190 La Thuile		10 Jul 2022	https://www.inaturalist.org/observations/148503988
45.67347	8.192685	Italy		Provincia di Biella		26 Jun 2022	https://www.inaturalist.org/observations/128322197
45.607022	5.880581	France		La Motte-Servolex		27 Jul 2022	https://www.inaturalist.org/observations/148471361
41.708883	12.686584	Italy		00045 Genzano di Roma RM		19 Jun 2020 ·	https://www.inaturalist.org/observations/50589925
42.520279	13.370167	Italy		Province of L'Aquila		20 Mar 2022	https://www.inaturalist.org/observations/117982142
46.092417	11.129107	Italy		Trento TN		17 Apr 2022	https://www.inaturalist.org/observations/111799219
46.308144	13.645368	Slovenia		5232 Lepena		13 Sep 2022	https://www.inaturalist.org/observations/136719406
46.813151	15.197335	Austria		Deutschlandsberg, Österreich		02 May 2022	https://www.inaturalist.org/observations/115229550
48.120335	16.85712	Austria		Bruck an der Leitha District		26 May 2022	https://www.inaturalist.org/observations/118897542
45.351789	14.404308	Croatia		Rijeka		22 Apr 2023	https://www.inaturalist.org/observations/156030581
43.50614	16.525888	Croatia		Stobreč		20 Sep 2022	https://www.inaturalist.org/observations/135826496
44.478526	20.577608	Serbia		Kosmaj, Beli kamen, RS		19 Jun 2022	https://www.inaturalist.org/observations/122517962
42.892787	23.812825	Bulgaria		Botevgrad Municipality		23 May 2019	https://www.inaturalist.org/observations/149831018
41.050263	28.675836	Turkey		Avrupa Yakası, İstanbul		24 Sep 2015	https://www.inaturalist.org/observations/137946662
37.128366	33.269677	Turkey		Dere, 70000 Dere/Karaman Merkez/Karaman, Türkiye		05 May 2012	https://www.inaturalist.org/observations/147206115
41.039159	21.22061	North Macedonia		Pelister National Park, Municipality of Bitola, Pohjois-Makedonia		14 May 2018	https://www.inaturalist.org/observations/70942398
44.089939	27.826083	Romania		Ion Corvin		14 Aug 2022	https://www.inaturalist.org/observations/131116205
44.009222	20.515906	Serbia		Grabovica		06 Aug 2022	https://www.inaturalist.org/observations/129957359
47.05396	18.771033	Hungary		Perkáta kert		14 Jun 2022	https://www.inaturalist.org/observations/128760818
47.480808	19.077942	Hungary		Vendel utca, Budapest IX. kerület, Budapest		17 Oct 2021	https://www.inaturalist.org/observations/101319108
55.077575	26.055761	Lithuania		Švenčionys District Municipality		11 May 2022	https://www.inaturalist.org/observations/116544186
55.355872	23.127043	Lithuania		60192		04 Jun 2023	https://www.inaturalist.org/observations/165469224
55.163433	22.47985	Lithuania		Eičiai 73145		06 Oct 2022	https://www.inaturalist.org/observations/141438414
56.277602	28.492023	Russia	Pskov Prov.	Sebezh		26 Apr 2023	https://www.inaturalist.org/observations/156716549
59.407183	28.574416	Russia	Leningrad Prov.	Bolshoi Lutsk		03 Oct 2021	https://www.inaturalist.org/observations/102009560
60.202288	24.89063	Finland		Uusimaa, Southern Finland		29 Jul 2021	https://www.inaturalist.org/observations/90268029
60.271504	22.992622	Finland		Salo, Suomi		24 Jun 2022	https://www.inaturalist.org/observations/123338835
60.687973	21.84025	Finland		23100 Korvensuu, Suomi		17 Jul 2021	https://www.inaturalist.org/observations/87364723
61.459641	24.129065	Finland		36270 Kangasala, Suomi		01 Jun 2023	https://www.inaturalist.org/observations/165008820
62.879317	27.665535	Finland		Haapaniemi, Kuopio, Suomi		01 May 2023	https://www.inaturalist.org/observations/159808403
63.961032	24.088755	Finland		69100 Kannus, Suomi		20 Jul 2022	https://www.inaturalist.org/observations/127267081
63.852594	23.10595	Finland		Tulliperä Kokkola, Suomi		05 Sep 2020	https://www.inaturalist.org/observations/58586320
64.866223	25.485881	Finland		91910 Liminka, Suomi		18 Sep 2020	https://www.inaturalist.org/observations/59967784
59.320187	18.038541	Sweden		Stockholm, SE-ST, SE		06 Sep 2020	https://www.inaturalist.org/observations/58719902
43.626628	6.989473	France		06370 Mouans-Sartoux		15 Jul 2018	https://www.inaturalist.org/observations/75181436
42.723837	21.347725	Kosovo		Hamit Limani, Prishtinë		12 May 2023	https://www.inaturalist.org/observations/161252785
52.99181	-6.082154	Ireland		Commons, Co. Wicklow		20 Jul 2022	https://www.inaturalist.org/observations/131448582
53.117045	-9.069039	Ireland		Sheshia, Bellharbour, Co. Clare		3 May 2022 ·	https://www.inaturalist.org/observations/123808627
54.467023	-6.094069	United Kingdom		Lisburn and Castlereagh		14 May 2020	https://www.inaturalist.org/observations/45931469
54.069017	-4.767889	Isle Of Man		Rushen, Isle of Man		22 Jun 2022	https://www.inaturalist.org/observations/125570922
52.837928	-6.941312	Ireland		Graigue, Carlow		09 May 2020	https://www.inaturalist.org/observations/45357973
38.69638	-9.324335	Portugal		2780 Oeiras		23 Jun 2022	https://www.inaturalist.org/observations/124372291
52.33403	4.813057	Netherlands		Amsterdam Nieuw-West, Amsterdam		18 May 2023	https://www.inaturalist.org/observations/164040199
53.051123	4.799025	Netherlands		1791 DD Den Burg		05 Jun 2020	https://www.inaturalist.org/observations/48577988
53.59187	6.703922	Germany		Borkum, Deutschland		05 Aug 2012	https://www.inaturalist.org/observations/166871032
52.293745	21.05891	Poland		Bródno-Podgrodzie, Warszawa		11 Jun 2023	https://www.inaturalist.org/observations/166801269
50.035633	20.345242	Poland		Powiat wielicki		06 Jun 2020	https://www.inaturalist.org/observations/84412400
51.039124	17.164078	Poland		55-010 Siechnice		14 Apr 2023	https://www.inaturalist.org/observations/155362365
54.118017	23.272601	Poland		Powiat sejneński		29 Apr 2023	https://www.inaturalist.org/observations/157989402
49.234211	17.359593	Czech Republic		768 02 Soběsuky		12 Jun 2021	https://www.inaturalist.org/observations/82654900
50.105637	14.424216	Czech Republic		Holešovice, 170 00 Prague 7		04 May 2022	https://www.inaturalist.org/observations/115427067
50.702526	14.545807	Czech Republic		Česká Lípa		05 Jul 2018	https://www.inaturalist.org/observations/24525416
44.5631	25.938821	Romania		Buftea		24 Jun 2023	https://www.inaturalist.org/observations/169140488
45.564375	24.611945	Romania		Arefu		26 Aug 2022	https://www.inaturalist.org/observations/133103306
46.480359	26.832372	Romania		Nicolae Balcescu		09 Jul 2019	https://www.inaturalist.org/observations/63845272
50.061523	2.555472	France		Rue d'en Bas, Forceville, Picardie		09 Nov 2020	https://www.inaturalist.org/observations/64551100
50.809733	4.406545	Belgium		Watermael, Watermael-Boitsfort, Belgique		14 May 2023	https://www.inaturalist.org/observations/161569879
51.21976	3.229283	Belgium		Sint-Gillis Quarter, 8000 Bruges		25 Jul 2021	https://www.inaturalist.org/observations/88522983
50.094136	2.469345	France		Rue de la Gare, Vauchelles-lès-Authie, Picardie, FR		26 Aug 2020	https://www.inaturalist.org/observations/57899154
50.497653	3.939323	Belgium		7050 Jurbise, Belgique		04 Jul 2022	https://www.inaturalist.org/observations/126215038
50.522106	4.843114	Belgium		5080 La Bruyère, Belgique		05 Jun 2022	https://www.inaturalist.org/observations/120400064
57.139689	65.498683	Russia	Tyumen Prov.	Tyumen		10 May 2022	https://www.inaturalist.org/observations/116386107
54.888344	83.111069	Russia	Novosibirsk Prov.	Novosibirsk		08 Jun 2023	https://www.inaturalist.org/observations/166251741
56.120272	69.471896	Russia	Tyumen Prov.	Ishim		03 Jun 2023	https://www.inaturalist.org/observations/166531709
55.205379	61.464466	Russia	Chelyabinsk Prov.	Traktorozavodsky district, Chelyabinsk		06 May 2023	https://www.inaturalist.org/observations/160867332
57.132665	48.891064	Russia	Kirov Prov.	Soviet district		18 Jul 2016	https://www.inaturalist.org/observations/37367413
52.638056	56.236944	Russia	Bashkortostan Rep.	Kugarchinskiy rayon		23 Jul 2020	https://www.inaturalist.org/observations/54039510
48.688592	44.410257	Russia	Volgograd Prov.	Soviet district, Volgograd		19 Jun 2012	https://www.inaturalist.org/observations/77462389
41.40	23.41	Greece		Agkistro	F. Konstantinov	04 Jun 2016
49.924000	11.632000	Germany		Bavaria, Bayreuth (BT), Neunkirchen am Main, Streuschicht	S. Kuechler	07 Apr 2011
53.107000	14.000000	Germany		Brandenburg, Schorfheide-Chorin	M. Gossner	01 Jul 2009
48.758900	11.838300	Germany		Bavaria, Siegenburg, Dassfeld	F. Schmolke	05 Jun 2011
41.399000	-8.752000	Portugal		Porto, Porto, Povoa de Varzim	R. Andrade	20 Jul 2019
60.209200	20.251900	Finland		Aland Islands, Alandia, Sund, Praestoe	T. Rintala	29 Jun 2009
62.144500	25.709400	Finland		Tavastia australis, Muurame, Raudanlahti	T. Rintala	16 Jun 2008
47.899000	9.390000	Germany		Baden-Wuerttemberg, Pfrunger Ried	M. Gossner	07 Sep 2011
60.153400	24.722200	Finland		Nylandia, Espoo, Finno	P. Ahlroth	29 Jan 2008
60.073000	23.865200	Finland		Nylandia, Inkoo, Gardsboele	P. Ahlroth	30 Jun 2007
44.98475	81.03147	China		Borohoro Mts Range, Wenquan	N. Vinokurov	13 Jul 2011
51.71877	-1.24105	United Kingdom		Kennington, Berks.	G. Scudder	15 Jul 1960
41.41000	23.40000	Bulgaria		nr Novo Hodzhovo	F. Konstantinov	04 Jun 2016
58.71666	68.68333	Russia	Tyumen Prov.	Platform 4, Missiya', Uvatskiy Dist.	Bukhkalo	01 Aug 2005
50.61000	36.00000	Russia	Belgorod Prov.	Nr Borisovka, student basecamp	A. Namyatova	04 Jul 2019
59.57361	30.14306	Russia	Leningrad Prov.	Gatchina, Roshchinskaya st.	V. Tyts & S. Davletshin	16 Aug 2020
55.82600	37.56100	Russia	Moscow Prov.	Moscow, Timiryazev Academy fields	A. Tokareva	27 Jul 2018
52.99210	52.12480	Russia	Orenburg Prov.	Buzuluksky Bor National Park, 1 km SW of Partizanskiy	F. Konstantinov & A. Namyatova	25 May 2021
55.00872	20.61126	Russia	Kaliningrad Prov.	Curonian Spit, SW of Lesnoy	A. Namyatova, V. Tyts, P. Dzhelali	18 Aug 2022
40.62972	14.48611	Italy		Positano	E. Miram	26 Jul 1925
59.43000	28.32000	Russia	Leningrad Prov.	Serezhino	Bianchi	28 Jul 1895
51.76666	55.10000	Russia	Orenburg Prov.	Nr Orenburg	A. Ivanov	03 Jul 1924
40.62972	14.48611	Italy		Positano	E. Miram	07 Aug 1925
59.96666	42.75000	Russia	Vologda Prov.	Tot'ma	Barovsky	25 Aug 1935
44.41667	34.05000	Ukraine		Alupka Distr., Southern coast of Crimea	N. Kuznetsov	02 Jul 1899
59.96666	42.75000	Russia	Vologda Prov.	Tot'ma	Barovsky	16 Sep 1933
42.51666	75.38333	Kyrgyzstan		Kyrgyz [Aleksandr] Mts. Range, Valley of Tuyuk River	Shnitnikov	28 Aug 1931
41.82700	46.26900	Georgia		Lagodekhi, Tiflis Government	A. Mlokossiewich	02 Oct 1896
44.41667	34.05000	Ukraine		Alupka Distr., Southern coast of Crimea	N. Kuznetsov	02 Jul 1899
40.73333	44.86666	Armenia		Dilijan [Delizhan]	Dyakonov	10 Aug 1927
38.60000	48.50000	Azerbaijan		Between Dzhoni and Tuli	Varshalovich	31 Jul 1931
43.14681	76.90013	Kazakhstan		Bolshaya Almatinka River	Shnitnikov	25 Aug 1933
50.61000	36.00000	Russia	Belgorod Prov.	Nr Borisovka, student basecamp	A. Namyatova	04 Jul 2019
41.82700	46.26900	Georgia		Lagodekhi, Tiflis Government	A. Mlokossiewich	18 Jul 1911
42.95000	44.65000	Russia	North Ossetia Rep.	Redant Pervyy [Redant] nr Vladikavkaz	Vinogradov	19 Jul 1906
41.75000	46.22000	Georgia		Valley of Antsal-Or River, Tiflis Government	A. Mlokossiewich	19 Mar 1913
43.14681	76.90013	Kazakhstan		Bolshaya Almatinka River	Shnitnikov	25 Aug 1933
40.62972	14.48611	Italy		Positano	Miram	17 Nov 1925
40.20000	44.53333	Armenia		Yerevan	Ter-Minasyan & Richter	18 Aug 1935
59.76666	30.10000	Russia	Leningrad Prov.	Gorelovo	Novotortsev	13 Jul 1898
42.51666	72.23333	Kyrgyzstan		Talas [Dmitrievskoye]	Bianchi	11 Jul 1930
60.21670	31.80000	Russia	Leningrad Prov.	Ligovo, Baltiyskaya Railway	Novotortsev	04 Aug 1897
59.43000	28.32000	Russia	Leningrad Prov.	Serezhino	Bianchi	28 Jul 1896
51.76666	55.10000	Russia	Orenburg Prov.	Nr Orenburg	A. Ivanov	05 Sep 1924
44.13333	43.01666	Russia	Stavropol Terr.	Zheleznovodsk, Caucasia	Artobolevskiy	Jul 1913
41.65000	44.68333	Georgia		Kodzori nr Tbilisi [Tiflis]	Kirshenblat	12 Aug 1931
43.00000	40.96666	Georgia		Sokhumi [Sukhum]	G. Zimin	24 Nov 1927
59.86666	29.91666	Russia	Leningrad Prov.	Novyy Petergof [Petrodvorets]	Chekini	16 Jul 1896
45.33333	36.45000	Ukraine		Kerch	A. Kiritshenko	17 Aug 1918
44.86222	40.34917	Russia	Adygeya Rep.	Dondukovskaya	Gorchakovskiy	01 Aug 1921
42.78333	44.68333	Russia	Ingushetia Rep.	Egochkal nr Dzheyrakh	A. Kiritshenko	24 Jul 1927
44.03222	42.86861	Russia	Stavropol Terr.	Podkumok river near Essentuki	Bartenev	06 Aug 1914
40.73333	44.86666	Armenia		Dilijan [Delizhan]	Lyubishchev	05 Aug 1934
38.60000	48.50000	Azerbaijan		Between Dzhoni and Tuli	Varshalovich	31 Jul 1931
58.13333	52.65000	Russia	Udmurtia Rep.	Glazov, Vyatka Prov.	Nesvitskiy	1900
54.12000	54.12000	Russia	Bashkortostan Rep.	Aleksandrovsk nr Belebey [former Ufa Government]	Sokolov	Aug 1907
44.81666	78.15000	Kazakhstan		Apiary Zubenko, Bolshaya Almatinka	Shnitnikov	17 Aug 1928
41.56666	70.00000	Uzbekistan		Chimgan	Martynova	12 Jul 1924
44.86222	40.34917	Russia	Adygeya Rep.	Dondukovskaya	Gorchakovskiy	01 Aug 1921
42.79628	44.63545	Russia	North Ossetia Rep.	Nizhniy Lars [Stariy Lars] on the Terek River	Ryabov	24 Aug 1920
38.80000	48.63200	Azerbaijan		Baliton [Paleton] (1200), Astara Distr., Talysh	Znoiko	17 Jul 1932
40.18110	44.51360	Armenia		Eriwan (Yerevan, Erewan, Yervandavan, Revan, Ereun, Erevan, Iravan, Ayrivan)	Ter-Minasyan	06 Aug 1952
38.92111	46.22167	Armenia		Between Meghri [Megri] and Lehvaz [Legvaz]	Loginova	05 Jun 1955
44.57310	38.07470	Russia	Krasnodar Terr.	Gelendzhik	Vorobyev	15 Jun 1908
42.78333	44.85000	Russia	Ingushetia Rep.	Salgi	A. Kiritshenko	03 Aug 1927
40.53305	46.25583	Azerbaijan		Between Chaykend and Gergel' nr Ganca	A. Lubischev	26 Jul 1934
43.01666	41.26666	Georgia		Tsebelda near Sokhumi, Abkhazia	Voronov	Aug 1931
53.05000	29.67000	Belarus		Turki [former Bobruysk Uezd, Minsk Gov.]	Afanasyeva	01 Aug 1917
44.11722	41.47583	Russia	Krasnodar Terr.	Stanitsa Peredovaya on Urup River	Korol'kov	16 Jul 1910
40.20000	44.53333	Armenia		Yerevan	Ter-Minasyan & Richter	18 Aug 1935
40.53305	46.25583	Azerbaijan		Between Chaykend and Gergel' nr Ganca	Lyubishchev	26 Jul 1934
41.65000	44.68333	Georgia		Kodzori nr Tbilisi [Tiflis]	Kirshenblat	12 Aug 1931
42.51666	72.23333	Kyrgyzstan		Talas [Dmitrievskoye]	Bianchi	11 Jul 1930
45.11666	79.03333	Kazakhstan		Nr Kapal [Kopal], Semirech'e	Shnitnikov	1907
44.68100	34.40700	Ukraine		Alushta	A. Kiritshenko	07 Aug 1908
45.11666	79.03333	Kazakhstan		Nr Kapal [Kopal], Semirech'e	Shnitnikov	19 Sep 1932
52.78333	33.08333	Russia	Bryansk Prov.	Petrovskoe, [former Mtsenskiy uyezd of Orel government]	Favorskiy	06 Jul 1897
40.20000	44.53333	Armenia		Yerevan, Zanga River	Ter-Minasyan	28 Jun 1952
38.88333	46.25000	Armenia		Meghri on Araks River	Tryapitsin	28 Jun 1953
52.76666	52.25000	Russia	Orenburg Prov.	Buzuluk Nature Reserve	Chistovskiy	10 Aug 1941
43.48333	43.60000	Russia	Kabardino-Balkaria Rep.	Nalchik	Kirichenko	17 Jul 1914
44.75000	33.86670	Ukraine		Bakhchysaray [Bakhchisaray]	A. Kiritshenko	10 Jul 1915
44.56666	34.33333	Ukraine		Frunzenskoe [Partenit]	A. Kiritshenko	22 Aug 1907
44.95000	34.08333	Ukraine		Simferopol	A. Kiritshenko	30 May 1907
44.68100	34.40700	Ukraine		Alushta	A. Kiritshenko	06 Aug 1908
43.48333	43.60000	Russia	Kabardino-Balkaria Rep.	Nalchik	A. Kiritshenko	03 Aug 1914
43.88333	42.71666	Russia	Stavropol Terr.	Kislovodsk, North Caucasia	A. Lubischev	31 Jul 1908
43.31666	40.23333	Georgia		Gagry	Tryapitsin	15 Aug 1957
52.51670	13.40000	Germany		Berlin	Unknown	no date provided
43.68333	40.20000	Russia	Krasnodar Terr.	Krasnaya Polyana, Western Caucasus	A. Kiritshenko	1907
44.66667	34.41667	Ukraine		Angarskiy pass	B. Grigoriev	19 Jun 1907
43.14681	76.90013	Kazakhstan		Bolshaya Almatinka River	Shnitnikov	25 Aug 1933
46.46666	30.71666	Ukraine		Odessa, Luzanovka	A. Kiritshenko	04 May 1920
45.33333	36.45000	Ukraine		Kerch	A. Kiritshenko	17 Aug 1918
44.83330	34.80000	Ukraine		Voronova Dolina prope Morskoye (Kapsikhor) [Kapsichor], distr. Feodosia	Golovleva	02 Aug 1913
40.78333	43.83333	Armenia		Gyumri [Leninakan]	Esterberg	23 Jul 1940
44.40000	33.93333	Ukraine		Opolznevoe [Kikeneiz], S coast of Crimea	A. Kiritshenko	29 Jun 1926
44.95000	34.08333	Ukraine		Simferopol	A. Kiritshenko	24 Jun 1924
40.15000	44.28333	Armenia		Aygr-lich lake, Ecmiadzin [Echmiadzin]	Richter and Ter-Minasyan	03 Jun 1947
40.78333	43.83333	Armenia		Gyumri [Leninakan]	Esterberg	27 Jul 1940
39.01666	46.25000	Armenia		Lichkvaz, Megrinskiy Dist.	Atadzhanyan	01 Jun 1925
45.33333	36.45000	Ukraine		Kerch	A. Kiritshenko	05 Sep 1917
40.18110	44.51360	Armenia		Eriwan (Yerevan, Erewan, Yervandavan, Revan, Ereun, Erevan, Iravan, Ayrivan)	A. Lubischev	01 Aug 1934
47.46600	84.87100	Kazakhstan		Zaysan	Dobrzhanskiy and Kerkis	02 Jul 1927
47.10000	85.50000	Kazakhstan		Temir-su Gorge, Saur Mts. Ridge	Dobrzhanskiy and Kerkis	03 Jul 1927
47.73000	84.63000	Kazakhstan		Uydone [Uidene] River, Saur Mt. Ridge	Dobrzhanskiy and Kerkis	29 Jun 1927
40.20000	44.53333	Armenia		Yerevan, Zanga River	Ter-Minasyan	28 Jun 1952
43.48333	43.60000	Russia	Kabardino-Balkaria Rep.	Nalchik	A. Kiritshenko	03 Aug 1914
40.20000	44.53333	Armenia		Yerevan	A. Lubischev	01 Aug 1934
59.61667	30.73333	Russia	Leningrad Prov.	Sablino	Bianchi	12 Aug 1922
43.01666	41.26666	Georgia		Tsebelda near Sokhumi, Abkhazia	Voronov	Aug 1931
38.41666	56.25000	Turkmenistan		Garrygala [Kara-Kala]	Kryzhanovskij	06 May 1952
53.33333	50.18333	Russia	Samara Prov.	Krasnaya Glinka, 25 km of Samara	A. Lubischev	24 Jun 1929
41.59000	44.08000	Georgia		Aleksandersgilf on the Khrami River	Dyakonov	15 Aug 1931
41.65000	44.68333	Georgia		Kodzori nr Tbilisi [Tiflis]	Kirshenblat	12 Aug 1931
54.20000	52.86666	Russia	Orenburg Prov.	Pavlovka [former Bugul'ma uezd of Samara government]	Elachich	19 Jun 1907
53.25000	34.40000	Russia	Bryansk Prov.	Bryansk	Stark	20 Jul 1927
59.94500	30.24200	Russia	Leningrad Prov.	Smolenskoe cemetery, St.-Petersburg	Moravits	16 Jul 1862
38.80000	48.63200	Azerbaijan		Baliton [Paleton] (1200), Astara Distr., Talysh	Znoiko	19 Jul 1932
55.70889	35.55500	Russia	Moscow Prov.	Porechye	Bianchi	24 Jun 1903
53.25000	34.40000	Russia	Bryansk Prov.	Bryansk	Stark	20 Jul 1927
53.33333	51.18333	Russia	Samara Prov.	Krasnaya Glinka, Malaya Tsarevshchina	A. Lubischev	24 Aug 1928
47.57000	76.90000	Kazakhstan		Valley of Bol'shaya Almatinka [Almatinka] River	Shnitnikov	09 Aug 1938
51.15690	54.99530	Russia	Orenburg Prov.	Sol'-Iletsk [Iletsk]	F. Lukjanovitsh	22 Aug 1938
43.01666	44.66666	Russia	North Ossetia Rep.	Vladikavkaz	Vinogradov	04 Aug 1906
44.10000	39.08333	Russia	Krasnodar Terr.	Tuapse	Gorchakovskiy	10 Aug 1921
42.51666	75.38333	Kyrgyzstan		Kyrgyz [Aleksandr] Mts. Range, Valley of Tuyuk River	Shnitnikov	16 Aug 1931
54.50000	56.53333	Russia	Bashkortostan Rep.	Zelim River, System of Belaya River	Gekker	19 Jul 1925
59.76666	30.10000	Russia	Leningrad Prov.	Gorelovo	Novotortsev	11 Aug 1898
53.25000	34.40000	Russia	Bryansk Prov.	Bryansk	Stark	20 Jul 1927
60.21670	31.80000	Russia	Leningrad Prov.	Ligovo, Baltiyskaya Railway	Novotortsev	05 Aug 1897
38.80000	48.63200	Azerbaijan		Baliton [Paleton] (1200), Astara Distr., Talysh	Znoiko	17 Jul 1932
54.38333	39.35000	Russia	Ryazan Prov.	Popad'ino, Ryasan' Prov., Mikhailovskiy Dist.	Lebedev	07 Jul 1913
58.65000	32.78333	Russia	Novgorod Prov.	Oksochi, Oktyabr'skaya Railway Station	Gudim	19 Jul 1926
40.51666	46.33333	Azerbaijan		Adzhikend, Ganca [Elizavetpol], [former Transcaucasia Prov.]	F. Lukjanovitsh	16 Jul 1933
52.01666	48.80000	Russia	Saratov Prov.	Pugachevsk [Nikolaevsk]	D'yakonov	1925
45.33333	36.45000	Ukraine		Kerch	A. Kiritshenko	05 Aug 1918
42.95000	44.65000	Russia	North Ossetia Rep.	Redant Pervyy [Redant] nr Vladikavkaz	Vinogradov	19 Jul 1906
44.95000	34.08333	Ukraine		Simferopol	Bazhenov	1898
44.41667	34.05000	Ukraine		Alupka Distr., Southern coast of Crimea	N. Kuznetsov	02 Jul 1899
43.28777	40.26833	Georgia		Novaya Gagra	Tryapitsin	15 Sep 1957
51.36666	51.56666	Kazakhstan		Oral [Uralsk]	Berezovskiy	15 Jul 1897
59.94083	30.30250	Russia	Leningrad Prov.	Academy of Sciences	Bianchi	11 May 1895
52.88333	40.46666	Russia	Tambov Prov.	Michurinsk [Kozlov]	W. H. Lange	no date provided
59.98000	30.29000	Russia	Leningrad Prov.	St Petersburg, Kamennyi Is.	Jakobson	21 Aug 1919
50.43333	30.51666	Ukraine		Kiev	Jacobson	20 Aug 1898
46.16666	7.78333	Switzerland		St. Niklaus [St. Nicolas]	Neklyudov	Jul 1896
53.91666	39.50000	Russia	Ryazan Prov.	Gremyachka	Semenov	19 Sep 1901
59.96666	30.25000	Russia	Leningrad Prov.	St.-Peterburg, Krestovskiy Island	R. Virketis	13 Aug 1923
44.66670	34.01670	Ukraine		Ulu-Sala	G. Khristoforov & K. Khristoforov	no date provided
59.76666	30.10000	Russia	Leningrad Prov.	Gorelovo	Novotortsev	08 Jul 1898
48.90000	27.65000	Ukraine		Verkhovka [former Mahilyow uezd]	Chekini	25 May 1901
58.08900	40.18800	Russia	Yaroslavl Prov.	Zhedenovo	Shestakov	1915
59.43333	28.31667	Russia	Leningrad Prov.	Serezhino	Bianchi	23 Jul 1895
43.01666	44.66666	Russia	North Ossetia Rep.	Vladikavkaz	Bugdanov	17 May 1912
59.98900	30.40900	Russia	Leningrad Prov.	Lesnoye, St.Petersburg	Novotortsev	no date provided
58.08900	40.18800	Russia	Yaroslavl Prov.	Zhedenovo	Shestakov	1915
53.21666	50.61666	Russia	Samara Prov.	Kinel'	A. Lubischev	21 May 1930
44.43389	34.11444	Ukraine		Gaspra	A. Reichardt	01 May 1932
44.98475	81.03147	China		Borohoro Mts Range, Wenquan	N. Vinokurov	13 Jul 2011
44.76666	20.45000	Yugoslavia		Topcidersko Brdo [Topchider] nr Belgrad	Martino	07 Jun 1927
47.10000	85.50000	Kazakhstan		Temir-su Gorge, Saur Mts. Ridge	Dobrzhanskiy and Kerkis	03 Jul 1927
38.95000	45.75000	Azerbaijan		Disar nr Ordubad	Ter-Minasyan	02 May 1934
42.51666	75.38333	Kyrgyzstan		Kyrgyz [Aleksandr] Mts. Range, Valley of Tuyuk River	Shnitnikov	31 Jul 1930
43.14681	76.90013	Kazakhstan		Bolshaya Almatinka River	Shnitnikov	25 Aug 1933
52.76666	52.25000	Russia	Orenburg Prov.	Buzuluk Nature Reserve	Chistovskiy	10 Aug 1941
42.79724	44.63602	Russia	North Ossetia Rep.	Staryi Lars, Georgian Military Road, Terek	Ryabov	24 Aug 1920
41.82700	46.26900	Georgia		Lagodekhi, Tiflis Government	A. Mlokossiewich	12 Aug 1916
47.30806	29.10306	Moldova		Cocieri	G. Zimin	12 Jun 1925
59.98333	30.26666	Russia	Leningrad Prov.	St.-Petersburg [Petrograd], Novaya Derevnya	Gudim	08 May 1925
39.00000	45.88333	Azerbaijan		Chananab, Naxcivan	Loginova	28 Apr 1955
53.33333	50.18333	Russia	Samara Prov.	Krasnaya Glinka, 25 km of Samara	A. Lubischev	27 Jun 1928
50.61000	36.00000	Russia	Belgorod Prov.	N part of Borisovka, nr Vorskla River	A. Namyatova	04 Jul 2019
46.45000	33.85000	Ukraine		Askaniya-Nova Nature Reserve	S. Medvedev	1926
58.75000	28.20000	Russia	Pskov Prov.	Shchepets [former Yaz'vo Volost', Gdov Government]	Ivanov	26 Jul 1901
59.98200	30.36000	Russia	Leningrad Prov.	Lesnoy: St.-Petersburg, park nr Academy of Forestry Engineering	Bianchi	14 Sep 1899
44.95000	34.08333	Ukraine		Simferopol	A. Kiritshenko	26 Jun 1907
42.03333	47.65000	Russia	Dagestan Rep.	Between Adaga and Kubachi	K. Satunin	27 Jul 1910
41.82700	46.26900	Georgia		Lagodekhi, Tiflis Government	A. Mlokossiewich	1912
40.51200	46.32900	Azerbaijan		Adjikend	Yakovleva	no date provided
43.28777	40.26833	Georgia		Novaya Gagra	Tryapitsin	15 Sep 1957
40.70000	44.20000	Armenia		Gekharot [former Keshishkend], 80 km SO Yerevan	Zaitzev	14 Apr 1958
46.45000	33.85000	Ukraine		Askaniya-Nova Nature Reserve	S. Medvedev	1926
58.65000	29.90000	Russia	Leningrad Prov.	Rapti, nr Luga	Shnitnikov	07 Aug 1923
59.98200	30.36000	Russia	Leningrad Prov.	Lesnoy: St.-Petersburg, park nr Academy of Forestry Engineering	Meshkovskiy	no date provided
40.51200	46.32900	Azerbaijan		Adjikend	Yakovleva	no date provided
59.93000	32.22000	Russia	Leningrad Prov.	Zvanka St., Murmanskaya Railway	Kapustin	31 Jul 1927
40.20000	44.53333	Armenia		Yerevan	Shelkovnikov	23 Jun 1924
44.83330	34.80000	Ukraine		Voronova Dolina prope Morskoye (Kapsikhor) [Kapsichor], distr. Feodosia	Golovleva	02 Aug 1913
49.85000	32.25000	Ukraine		Mekhedovka, Zolotonoshsk uezd, Poltavskaya prov.	Kizeritskiy	07 Jul 1913
42.90000	44.46666	Russia	North Ossetia Rep.	Koban nr Vladikavkaz	A. Kiritshenko	21 Jul 1925
44.43333	34.06666	Ukraine		Simeiz	A. Kiritshenko	17 Jun 1915
48.53300	23.50000	Ukraine		Mezhgor'e, Zakarpatskaya Prov.	Kiryakova	May 1958
53.21666	39.95000	Russia	Lipetsk Prov.	Kazachiy Les [former Ranenburgskiy Uezd, Ryazanskaya Gov.]	Semenov	30 Jun 1911
41.14000	44.75000	Armenia		Akhtala, Lori prov.	Unknown	24 Aug 1928
49.86361	32.26000	Ukraine		Mehedovka	Kizeritskiy	07 Jul 1913
44.60000	33.53333	Ukraine		Sevastopol'	Yakovlev	30 Apr 1906
48.68100	26.58900	Ukraine		Kam'yanets'-Podil's'kyy [Kamenez-Podolsk]	Yakubovskiy	1908
54.76600	71.08200	Russia	Omsk Prov.	Isil'kul Distr., Kromy	V. Bylyaev	10 Jul 1911
57.48200	40.10000	Russia	Yaroslavl Prov.	Berditsino	Unknown	08 Aug 1890
57.60800	39.85700	Russia	Yaroslavl Prov.	Yaroslavl'	Kokuev	no date provided
44.95000	34.08333	Ukraine		Simferopol	A. Kiritshenko	30 May 1907
45.18000	35.32000	Ukraine		Feodosiya distr., Karadag	Aleksandrov	28 Jun 1913
48.68100	26.58900	Ukraine		Kam'yanets'-Podil's'kyy [Kamenez-Podolsk]	Yakubovskiy	1908
41.82700	46.26900	Georgia		Lagodekhi, Tiflis Government	A. Mlokossiewich	19 Jun 1913
38.23333	26.90000	Turkey		Golcuk [Goelchik], Bozdagh Mts., Izmir [Smirna] Prov.	B. Uvarov	29 Jul 1931
49.40278	26.98389	Ukraine		Dubovo	A. Kiritshenko	15 Apr 1921
44.68100	34.40700	Ukraine		Alushta	A. Kiritshenko	07 Aug 1908
58.75917	28.19889	Russia	Pskov Prov.	Shepets	Ivanov	22 Jul 1901
44.75000	33.86670	Ukraine		Bakhchysaray [Bakhchisaray]	Unknown	13 Aug 1913
38.91921	46.22234	Armenia		Meghri	E. Antonova	16 Apr 1959
52.51670	13.40000	Germany		Berlin	Unknown	no date provided
44.80000	33.95000	Ukraine		Skalistoye [Bodrak-Tavricheskiy]	Pavlovskiy	17 Jun 1911
53.91666	39.50000	Russia	Ryazan Prov.	Gremyachka	Semenov	28 Jul 1908
40.51200	46.32900	Azerbaijan		Adjikend	Yakovleva	no date provided
57.48200	40.10000	Russia	Yaroslavl Prov.	Berditsino	Unknown	07 Sep 1890
44.78200	34.33400	Ukraine		Privol'noe [Taushan-Bazar]	B. Grigoriev	01 Jun 1907
53.25000	34.40000	Russia	Bryansk Prov.	Bryansk	Stark	03 May 1925
58.18333	68.23330	Russia	Tyumen Prov.	Tobol'sk, Panin Bugor	Samko	02 Aug 1925
58.13333	52.65000	Russia	Udmurtia Rep.	Glazov, Vyatka Prov.	Nesvitskiy	1900
59.98200	30.36000	Russia	Leningrad Prov.	Lesnoy, St Petersburg [Leningrad] surroundings	Gudim	23 Jun 1925
41.82700	46.26900	Georgia		Lagodekhi, Tiflis Government	A. Mlokossiewich	1896
58.13333	52.65000	Russia	Udmurtia Rep.	Glazov, Vyatka Prov.	Nesvitskiy	1900
59.76666	30.10000	Russia	Leningrad Prov.	Gorelovo	Novotortsev	11 Jul 1898
52.78333	33.08333	Russia	Bryansk Prov.	Petrovskoe, [former Mtsenskiy uyezd of Orel government]	Favorskiy	06 Jul 1897
59.43333	28.31667	Russia	Leningrad Prov.	Serezhino	Bianchi	17 Aug 1896
59.99600	30.15400	Russia	Leningrad Prov.	Olgino	Bianchi	01 Aug 1902
59.46666	31.00000	Russia	Leningrad Prov.	Ushaki, Novgorodskaya Railway	Ivashchentsov	03 Jul 1897
60.21670	31.80000	Russia	Leningrad Prov.	Ligovo, Baltiyskaya Railway	Novotortsev	19 May 1898
45.33333	36.45000	Ukraine		Kerch	A. Kiritshenko	26 May 1918
59.98200	30.36000	Russia	Leningrad Prov.	Lesnoy: St.-Petersburg, park nr Academy of Forestry Engineering	Bianchi	14 Sep 1899
53.19800	45.00200	Russia	Penza Prov.	Penza	Olsuf'ev	no date provided
59.61667	30.73333	Russia	Leningrad Prov.	Sablino	Bianchi	18 May 1922
48.55000	39.30000	Ukraine		Nr Lugansk	Talitskiy	01 Apr 1930
39.00000	45.88333	Azerbaijan		Chananab, Naxcivan	Ter-Minasyan	07 May 1934
53.19800	45.00200	Russia	Penza Prov.	Penza	Olsuf'ev	05 May 1921
51.66666	41.61666	Russia	Voronezh Prov.	Savala forestry, Ternovka	Stark	27 Jul 1951
42.55000	23.23000	Bulgaria		Vitosha mountain, Sofia	Martino	25 Jul 1953
47.57000	76.90000	Kazakhstan		Valley of Bol'shaya Almatinka [Almatinka] River	Kareev	23 Jun 1926
42.55000	23.23000	Bulgaria		Vitosha mountain, Sofia	Martino	11 Jun 1953
59.64900	28.20100	Russia	Leningrad Prov.	Preobrazhenka railway station, direction of Varshavskaya railway	Mazarakiy	no date provided
38.88333	46.00000	Azerbaijan		Ordubad	Kirshenblat	10 Jun 1934
42.61666	23.30000	Bulgaria		Dragalevtsi, Sofia	Martino	03 Jun 1953
44.43389	34.11444	Ukraine		Gaspra	A. Reichardt	01 May 1932
53.33333	50.18333	Russia	Samara Prov.	Krasnaya Glinka, 25 km of Samara	A. Lubischev	01 Jul 1928
43.68333	40.20000	Russia	Krasnodar Terr.	Krasnaya Polyana, Western Caucasus	A. Kiritshenko	May 1907
40.53333	44.75000	Armenia		Darachichag [Taghkadzor], Yerivanskiy Dist.	Malyushenko	1911
43.26666	76.91666	Kazakhstan		Almaty	Kirshenblat	29 May 1930
59.76666	30.10000	Russia	Leningrad Prov.	Gorelovo	Novotortsev	16 Jul 1898
41.04027	46.47750	Azerbaijan		Eldar	Mlokospv	21 Apr 1910
40.15000	44.78333	Armenia		Geghart [Gegart]	Richter and Ter-Minasyan	11 May 1938
40.53333	44.75000	Armenia		Darachichag [Taghkadzor], Yerivanskiy Dist.	Malyushenko	1911
48.16666	39.83333	Ukraine		Provalye	Talitskiy	16 May 1928
51.66640	39.17000	Russia	Voronezh Prov.	Voronezh	Chekanovskiy	19 May 1964
42.78333	44.85000	Russia	Ingushetia Rep.	Salgi	A. Kiritshenko	27 Jul 1927
58.13333	52.65000	Russia	Udmurtia Rep.	Glazov, Vyatka Prov.	Nesvitskiy	1900
44.55000	34.28330	Ukraine		Hurzuf [Gurzuf]	K. Arnoldi	09 May 1948
59.30306	31.46056	Russia	Leningrad Prov.	Drozhdovo	Gudim	11 Apr 1926
43.01666	44.66666	Russia	North Ossetia Rep.	Vladikavkaz	Bugdanov	17 May 1912
59.86666	29.91666	Russia	Leningrad Prov.	Novyy Petergof [Petrodvorets]	Chekini	22 Jun 1896
39.75000	46.73333	Azerbaijan		Susa [Shusha], Karabakh	F. Lukjanovitsh	12 Jun 1933
59.96666	30.25000	Russia	Leningrad Prov.	St.-Peterburg, Krestovskiy Island	R. Virketis	13 Aug 1923
58.08900	40.18800	Russia	Yaroslavl Prov.	Zhedenovo	Shestakov	1915
40.28778	44.33833	Armenia		Ashtarak	Ter-Minasyan	17 May 1948
44.03333	42.83333	Russia	Stavropol Terr.	Yessentuki, Terskaya Prov.	Bartenev	11 Jul 1914
58.80000	29.94900	Russia	Leningrad Prov.	Krupeli	Mazarakiy	19 Jul 1896
44.60000	33.53333	Ukraine		Sevastopol'	Yakovlev	30 Apr 1906
58.66389	49.70722	Russia	Kirov Prov.	Kirov	Selevin	Jun 1912
60.21670	31.80000	Russia	Leningrad Prov.	Ligovo, Baltiyskaya Railway	Novotortsev	19 May 1898
51.75000	18.08333	Poland		Khabirov, Kalish Dist.	Jachevski	25 Aug 1907
43.51666	16.23333	Croatia		Trogir D.	P. Rubtsov	23 Aug 1947
56.46666	53.80000	Russia	Udmurtia Rep.	Sarapul on Kama River	A. Lubischev	16 Jun 1927
40.15000	44.28333	Armenia		Aygr-lich lake, Ecmiadzin [Echmiadzin]	Richter and Ter-Minasyan	03 Jun 1947
53.21666	50.61666	Russia	Samara Prov.	Kinel'	A. Lubischev	30 May 1928
55.41666	55.55000	Russia	Bashkortostan Rep.	Birsk	Kossakovskiy	1918
40.15000	44.78333	Armenia		Geghart [Gegart]	Loginova	09 Jun 1955
39.05000	46.18400	Armenia		Lichk, Meghri Distr.	Loginova	09 Jun 1955
40.20000	44.53333	Armenia		Yerevan	Ter-Minasyan	06 Aug 1952
59.94500	30.24200	Russia	Leningrad Prov.	Smolenskoe cemetery, St.-Petersburg	Barovsky	29 May 1919
45.33333	36.45000	Ukraine		Kerch	A. Kiritshenko	05 Sep 1917
52.78333	33.08333	Russia	Bryansk Prov.	Petrovskoe, [former Mtsenskiy uyezd of Orel government]	Favorskiy	06 Jul 1897
56.20694	33.88972	Russia	Tver Prov.	Chertolino	Unknown	Jun 1899
44.86666	34.18333	Ukraine		Pionerskoye [Dzhalman] nr Simferopol	Kahovskiy	May 1910
38.95280	45.98140	Azerbaijan		Akulis, Ordubad Distr.	Tryapitsin	30 May 1957
40.51200	46.32900	Azerbaijan		Adjikend	F. Lukjanovitsh	16 Jul 1933
43.30806	77.20917	Kazakhstan		Talgar	Falkovich	08 May 1957
51.66666	41.61666	Russia	Voronezh Prov.	Savala forestry, Ternovka	B. Stark	03 May 1954
53.91666	39.50000	Russia	Ryazan Prov.	Gremyachka	Semenov	25 Aug 1908
59.93500	30.31000	Russia	Leningrad Prov.	St.-Petersburg, Alekseevskaya St.	Barovsky	03 Jun 1921
56.20694	33.88972	Russia	Tver Prov.	Chertolino	Unknown	Jun 1899
60.77611	46.32944	Russia	Vologda Prov.	Veliky Ustyug	Birulya	09 Jul 1895
55.78333	49.16666	Russia	Tatarstan Rep.	Kazan'	Chekanovskiy	23 Jun 1975
59.66666	30.45000	Russia	Leningrad Prov.	Pavlovsk	Ivashchentsov	23 Jun 1897
44.60000	33.53333	Ukraine		Sevastopol'	W. Pliginskiy	no date provided
44.95000	34.08333	Ukraine		Simferopol	W. Pliginskiy	20 Sep 1914
59.94500	30.24200	Russia	Leningrad Prov.	Smolenskoe cemetery, St.-Petersburg	Unknown	25 Jun 1897
52.51670	13.40000	Germany		Berlin	Unknown	no date provided
47.21472	38.82917	Russia	Rostov Prov.	Taganrog	V. Nikolaev	10 Sep 1904
44.60000	33.53333	Ukraine		Sevastopol'	W. Pliginskiy	no date provided
44.58333	33.58333	Ukraine		Belokamensk [Inkerman] nr Sevastopol'	W. Pliginskiy	14 May 1908
44.76666	20.45000	Yugoslavia		Topcidersko Brdo [Topchider] nr Belgrad	Martino	20 May 1927
40.15000	44.78333	Armenia		Geghart [Gegart]	Loginova	18 May 1955
39.05000	46.18400	Armenia		Lichk, Meghri Distr.	Zagulyaev	09 Jun 1955
49.80000	30.11666	Ukraine		Bila Tserkva [Belaya Tserkov']	Zaytsev	Jul 1904
54.68333	25.28333	Lithuania		Vilnius [Vilna]	Baranov	08 Apr 1908
43.17278	44.29222	Russia	North Ossetia Rep.	Ardon [stanitsa Ardonskaya]	Demokidov	28 Apr 1900
43.88333	42.71666	Russia	Stavropol Terr.	Kislovodsk, North Caucasia	A. Kiritshenko	31 Jul 1908
44.73333	34.30000	Ukraine		Kosmo-Damianovskiy Monastery, Alushta	W. Pliginskiy	17 Jun 1911
49.85000	32.25000	Ukraine		Mekhedovka, Zolotonoshsk uezd, Poltavskaya prov.	Kizeritskiy	Jun 1907
39.73472	45.18667	Armenia		Areni	Zhiltsova	24 May 1956
51.66666	41.61666	Russia	Voronezh Prov.	Savala forestry, Ternovka	B. Stark	03 May 1954
44.75000	33.86670	Ukraine		Bakhchysaray [Bakhchisaray]	W. Pliginskiy	12 May 1906
44.80000	20.47000	Yugoslavia		Belgrade [Beograd], Avala	Martino	02 Jun 1927
44.76666	20.45000	Yugoslavia		Topcidersko Brdo [Topchider] nr Belgrad	Martino	03 Jun 1927
60.01600	30.31800	Russia	Leningrad Prov.	Udel'naya	Knyazhetskiy	21 Jun 1917
44.95000	34.08333	Ukraine		Simferopol	Pavlovskiy	09 Jun 1911
38.91921	46.22234	Armenia		Meghri	Richter	18 Apr 1960
43.88333	42.71666	Russia	Stavropol Terr.	Kislovodsk, North Caucasia	A. Lubischev	no date provided
53.30000	82.98333	Russia	Altai Terr.	Pavlovsk	Rimskiy-Korsakov	06 Jun 1918
59.89750	30.30944	Russia	Leningrad Prov.	Mitrofanievskoe cemetery	Unknown	15 May 1901
40.86666	43.88333	Armenia		Karmrakar	Loginova	17 Jun 1955
55.41666	55.55000	Russia	Bashkortostan Rep.	Birsk	Kossakovskiy	1918
53.19778	22.37611	Poland		Wizna, Lomzhinskaya prov.	Barovsky	19 May 1915
46.46666	30.71666	Ukraine		Odessa, Kuyalnitskiy liman, Khadzhib	Znoiko	29 Apr 1923
44.83333	34.25000	Ukraine		Krasnoles'ye [Tavel']	G. Khristoforov & K. Khristoforov	06 May 1907
42.53400	41.81500	Georgia		Upper course of Kurts-Khana River, S of Abastumani	A. Kiritshenko	11 Jun 1949
38.73333	48.83333	Azerbaijan		Lirik, Mts. Talysh, Lenkoran'	Kreis	13 May 1909
40.53861	44.71139	Armenia		Darachichag	Unknown	no date provided
40.20000	44.53333	Armenia		Yerevan	Bryanskii	10 May 1909
44.78200	34.33400	Ukraine		Privol'noe [Taushan-Bazar]	A. Kiritshenko	04 Jun 1907
38.91921	46.22234	Armenia		Meghri	Richter	18 Apr 1960
59.98000	30.29000	Russia	Leningrad Prov.	St Petersburg, Kamennyi Is.	Yachevskiy	25 Jun 1919
43.10000	40.62000	Georgia		Gudauta, Abkhazia	Kurnakov	25 Apr 1955
49.67400	32.03900	Ukraine		Zolotonosha, Poltava Government	Kizeritskiy	01 May 1906
49.86361	32.26000	Ukraine		Mehedovka	Kizeritskiy	Jun 1907
60.21670	31.80000	Russia	Leningrad Prov.	Ligovo, Baltiyskaya Railway	Barovsky	17 Jun 1907
56.41000	60.50000	Russia	Sverdlovsk Prov.	Aramil'	K. Fadeev	19 Jul 2021
59.91525	30.33267	Russia	Leningrad Prov.	St Petersburg, Vvedenskiy canal st	K. Fadeev	27 May 2020
41.83750	43.37920	Georgia		Borjomi [Borzhomi]	A. Kasatkin and I. Shokin	18 Jun 2013
50.01694	14.48000	Czech Republic		Prague-Kunratice	P. Kment	17 Oct 2009
57.23816	65.50875	Russia	Tyumen Prov.	Bereznyakovskiy	K. Fadeev	11 Jul 2021
61.94366	30.57913	Russia	Karelia Rep.	970 m NW of Ruskeala, nr. Mramornaya st.	A. Namyatova, V. Tyts, P. Dzhelali	18 Jun 2022
42.16398	44.70445	Georgia		Ananuri Fortress nr Zhinvali Reservoir	A. Namyatova & S. Roth	31 May 2022
60.01872	30.34076	Russia	Leningrad Prov.	St Petersburg, Sosnovka park	K. Fadeev	10 May 2019
49.97278	40.56639	Russia	Voronezh Prov.	20 km SW Boguchar	S. Belokobylskij	08 Aug 2020
41.65000	44.68333	Georgia		Kodzori nr Tbilisi [Tiflis]	A. Kasatkin and I. Shokin	14 Jun 2013

## Sheet: DataSI1 Lygocoris pabulinus
Data SI1. Raw locality and collection event data for the Lygocoris pabulinus used for the ecological niche modelling, PCA and linear modelling analyses
Latitude	Longitude	Country	Province (in Russia)	Locality	Collector	Date	Genbank accession number or iNaturalist link
40.93889	44.77250	Armenia		Lorut, Lori prov	Unknown	30 Aug 1932
55.08000	29.97000	Belarus		Korolevo 18 verst SO Vitebsk	Birulya	27 Jul 1903
55.13333	30.50000	Belarus		Korolevo nr Vitebsk	Birulya	27 May 1905
55.00000	30.38333	Belarus		Mogilev Prov, Luskinopol	Birulya	18 Jul 1906
52.10000	26.81500	Belarus		Scrygalowo [Skrygalovo], Pripyat [Pripet] River	Gittermann	13 Jun 1930
55.18800	30.18800	Belarus		Vitebsk	Cherskiy	Jun-Jul 1899
55.00000	30.15000	Belarus		Zamostochye St., Vitebsk distr [former Senno uezd]	Birulya	14 Jun 1905
50.80000	4.40000	Belgium		Watermeal-Bosvoorde	E. Passauro	26 Jun 1931
50.81670	4.51670	Belgium		Tervuren	E. Passauro	11 Sep 1930
31.43333	103.16666	China		Kuser Valley, between villages Mungu and Chiuti	Potanin	1893
60.30000	22.30000	Finland		Pargas	V. Jakovlev	no date provided
43.52000	40.64000	Georgia		Avadkhara (Auadkhara), Abkhazia	Zhiltsova	26 Aug 1958
41.73333	43.53333	Georgia		Bakuriani	Bartenev, Kirshenblat, Sharov	1917-1945
41.91278	45.97000	Georgia		Banis-Khevi River	Kirshenblat	04 Jul 1934
41.39000	44.94000	Georgia		Didi Mughanlo [Did-Magal]	Shidlovskiy	27 Aug 1961
43.31666	40.23333	Georgia		Gagry	Pastukhov	Aug 1912
42.30306	44.81333	Georgia		Gometsari canyon [Gometrits-Kheoba], valley of Aragvi River	A. Kiritshenko	1949-07-11
42.91830	43.14400	Georgia		Tsena, Svanetia	Akramovskaya	1957-07-25
41.82700	46.26900	Georgia		Gometsari canyon [Gometrits-Kheoba], valley of Aragvi River	A. Kiritshenko	11 Jul 1949
42.87890	43.15190	Georgia		Korel'dash	Akramovskaya	26 Jul 1957
48.78333	8.41666	Germany		Bad Herrenalb [Herrenalb]	Adelung	25 Aug 1898
54.45266	9.96316	Germany		Lindhof bei Lindhoft	T. Haye	10 Jul 2001
40.02000	9.30000	Italy		montes Gennargentu	Krausse	no date provided
49.16666	85.60000	Kazakhstan		Koton-Karagay	Dobrzhanskiy and Kerkis	31 Jul 1927
49.07000	85.44000	Kazakhstan		valley of Sarymsakty River, Koton-Karagay	Shvanvich	03 Jun 1916
41.99278	128.07694	North Korea		Between Muduvon and Paektu [Pektusan, Paektusan] mountain, North Khamgen	Borkhsenius	1950-08-20
41.90306	129.40806	North Korea		Between Sinmusan and Muduvon, Khamgen Pukdo	Borkhsenius	1950-10-19
47.10083	29.11917	Moldova		Pereryta nr Dubosary	L. Zimin	1924-07-10
47.92700	106.90900	Mongolia		Near Ulaanbaator [Urga]	Kozlov	30 Jul 1909-31 Jul 1909
47.91666	106.90000	Mongolia		Teril'dzha Stream, E Ulaanbaatar (Urga)	Kashkarov	08 Aug 1894
48.20000	109.43330	Mongolia		Breven-khit, SE Hentiy	Kondratieva	1926-08-10
48.54000	110.97600	Mongolia		Onon River SW Kentey	Kondratiev	1926-08-22
49.18333	107.55000	Mongolia		Manza River - Sharotai River	Klements	19 Jul 1897
49.15000	108.50000	Mongolia		Upper course of Zakhorin Gol River, Men'zya, N Kentey	Kondratieva	17 Sep 1927-18 Sep 1927
52.09117	5.82809	Netherlands		De Hoge Veluwe National Park	F. Konstantinov	2006-07-21
61.87550	12.14618	Norway		Tjernli	T. Andersen	2016-07-25
51.75000	18.08333	Poland		Khabirov, Kalish Dist.	Jachevski	1908-06-21
50.62700	86.34000	Russia	Altay Rep.	20 km SE Onguday 3 km SW pass Cheke-Taman	S. Belokobylskij	2007-07-16
50.65000	86.31000	Russia	Altay Rep.	20 km SE Onguday 3 km SW pass Cheke-Taman	S. Belokobylskij	2007
51.93333	85.31667	Russia	Altay Rep.	Altayskoe	Steinfeld	1908-07-10
51.79667	87.28250	Russia	Altay Rep.	Artybash	S. Belokobylskij	24 Jul 2007-28 Jul 2007
51.42000	87.80000	Russia	Altay Rep.	Bele nr Teletskoe Lake [former Tomsk Government]	Emeljanov	29 Jun 1909
51.03333	85.61667	Russia	Altay Rep.	Chuysk Road, Seminskiy Pass	Steinfeld	1908-07-01
51.57500	87.68600	Russia	Altay Rep.	Kokshi River, Teletskoe Lake	Ignatov	19 Jun 1901
52.03000	87.06000	Russia	Altay Rep.	Lebed' River, Tributary of Biya River	B. Klopotov	no date provided
51.50000	87.75000	Russia	Altay Rep.	Left bank of Chulyshman River, Mts nr Turalu	Emeljanov	27 Jul 1909
50.75300	86.13500	Russia	Altay Rep.	Ongudai, Altay	Berezovskiy	30 Jul 1898
50.91666	84.75000	Russia	Altay Rep.	Ust' Kan	Vinogradov	13 Jul 1923
50.21666	85.71666	Russia	Altay Rep.	Verkhniy Uymon	Silantev	11 May 1897-18 May 1897
50.65000	86.36666	Russia	Altay Terr.	20 km SE of Onguday, Central Altay	I.Kerzhner	15-17 Jul 1964
51.43333	87.76666	Russia	Altay Terr.	Bele, W bank of Teletskoye Lake	Ignatov	10 Aug 1901
51.36700	87.87100	Russia	Altay Terr.	Chirya River, Teletskoe Lake	Emeljanov	30 Jun 1909
51.05000	82.98333	Russia	Altay Terr.	Tigirekskiy National Reserve	A. Knyshov	17 Jul 2009
52.70667	141.23583	Russia	Amur Prov.	left bank of Amur river, Amur Liman	Soldatov	21 Jul 1907-22 Jul 1907
53.10223	133.00440	Russia	Amur Prov.	Selemdzhinskiy Dist., Selemdzha River, 5-6 km upstream of Ekimchan	Ryvkin	29 Aug 2006
62.86000	42.70000	Russia	Arkhangelsk Prov.	Bereznik on Severnaya Dvina River	Birulya	10 Jul 1895
54.50000	55.38333	Russia	Bashkortostan Rep.	Kuchumovo nr Chishmy St.	Sizov	29 Jun 1908
53.25000	34.40000	Russia	Bryansk Prov.	Bryansk	Stark	1927-07-30
52.78333	33.08333	Russia	Bryansk Prov.	Petrovskoe, [former Mtsenskiy uyezd of Orel government]	Favorskiy	06 Jun 1897
51.92139	102.43167	Russia	Buryatia Rep.	Arshan	S. Belokobylskij	26 Jul 2021-28 Jul 2021
51.90000	102.45000	Russia	Buryatia Rep.	Arshan, Valley of Tunka River	Ahnger	08 Jul 1911
54.10333	109.66639	Russia	Buryatia Rep.	Kudaldy [Kustaldy] river, 12 verst [12.8 km] from the river mouth, E from Baykal lake	Svatosh	1915-08-03
54.72000	102.54000	Russia	Buryatia Rep.	Tunka Stream	Ahnger	20 Jul 1911-10 Aug 1911
51.86666	104.78333	Russia	Irkutsk Prov.	Baykal, 18 verst from Listvyanka	Grodzkaya	02 Jul 1912
51.90000	105.05000	Russia	Irkutsk Prov.	Bolshie Koty, SW Bank of Baykal Lake	A. Kiritshenko	08-13 Aug 1950
52.31666	104.23333	Russia	Irkutsk Prov.	Irkutsk	Ahnger, Dorogostayskiy , Perevalova	1911-1915
51.71000	103.68000	Russia	Irkutsk Prov.	Kultuk	Jakovlev	no date provided
51.86100	104.86000	Russia	Irkutsk Prov.	Listvyanka [Listvenichnoe], SW of Baikal	A. Kiritshenko	02 Aug 1950
56.28333	101.71667	Russia	Irkutsk Prov.	Padun on Verkhnyaya Tunguska River	A. Czekanowski	1867
52.34500	104.48750	Russia	Irkutsk Prov.	Plishkino	S. Rodionov	05 Aug 1912
51.90306	105.07056	Russia	Irkutsk Prov.	Sibiryakov factory, W Baikal	Dorogostayskiy	31 Aug 1915
51.65000	103.70000	Russia	Irkutsk Prov.	Slyudyanka	Ahnger	22 Jul 1912
52.03970	105.41030	Russia	Irkutsk Prov.	Ushkanya Pad, SW coast of Baikal Lake	Kiritshenko	1950-07-27
43.27100	42.66200	Russia	Kabardino-Balkaria Rep.	Baksan river valley, upper of El'brus city	I. Kerzhner	1968-08-29
43.48333	43.60000	Russia	Kabardino-Balkaria Rep.	Nalchik	Golovleva	01 Aug 1914
54.98287	20.57383	Russia	Kaliningrad Prov.	Curonian Spit, SE border of Korolevskiy Bor	A. Namyatova, V. Tyts, P. Dzhelali	2022-08-18
54.50417	160.00814	Russia	Kamchatka Terr.	Kronotskiy Natural Reserve, Caldera of Uzon Volcano, meadow 823m NW from basecamp	A. Namyatova	11 Aug 2021
43.45000	41.73333	Russia	Karachay-Cherkessia Rep.	Teberda	L. Arens	30 Jul 1953
61.78333	34.30000	Russia	Karelia Rep.	Voytsozero	Martynov	24 Aug 2023
55.63800	83.30100	Russia	Kemerovo Prov.	Berchikul'	Gorchakovskiy	18 Jul 2011
52.08833	135.01499	Russia	Khabarovsk Terr.	Bureya Nature Reserve, valley of Pravaya Bureya River, nr Medvezhye	Ryvkin	23 Jul 2007
51.60000	140.43000	Russia	Khabarovsk Terr.	Entry of Taba River, Kizi Lake, lower course of Amur River	Formozov	07 Aug 1928
49.01666	140.30000	Russia	Khabarovsk Terr.	Imperatorskaya gavan'	Soldatov	22 Aug 1911-04 Sep 1911
52.14472	140.38667	Russia	Khabarovsk Terr.	Kada, right bank of Amur River	Kuznetsov	24 Aug 1911-04 Sep 1911
53.22472	141.33028	Russia	Khabarovsk Terr.	Nygay River, estuary of Amur River	Soldatov	10 Aug 1915
53.03583	141.22861	Russia	Khabarovsk Terr.	Ozerpakh	Chernavin, Soldatov	1907-1915
51.56500	139.83400	Russia	Khabarovsk Terr.	Sofiysk, lower course of Amur River	Formozov	22 Jul 1928
52.53333	89.66666	Russia	Khakassia Rep.	Matur River - Ada River	Wagner	11 Jul 1897
53.08333	91.38333	Russia	Khakassia Rep.	Sayanogorsk [Oznachennaya] on Yenisey River	F. K. Lukjanovitsh	1930-09-09
62.12030	73.77366	Russia	Khanty-Mansi Distr.	ap. 10km ESE Russkinskaya	F. Konstantinov	08 Aug 2022
58.33333	44.33333	Russia	Kostroma Prov.	Shilovo, ~25 km W of Manturovo	Veselova	21 Jul 1981
43.73000	40.12000	Russia	Krasnodar Terr.	Achishkho Mt., Chernomorskaya Prov.	F.K. Lukjanovitsh	07 Sep 1932
43.90000	40.53000	Russia	Krasnodar Terr.	Bambak Mt. Maikopskiy Dist., Kuban Prov.	Vorobyev	17 Jun 1907-18 Jun 1907
43.68472	40.25861	Russia	Krasnodar Terr.	Estosadok [former Estonka], near Krasnaya Polyana	Egorov and Fenakov	29 Aug 1928
63.67000	89.95000	Russia	Krasnoyarsk Terr.	Valley of Bakhta River, Turukhan Dist.	Ryvkin	18 Aug 1992
58.45100	92.16900	Russia	Krasnoyarsk Terr.	Yeniseysk	Society for investigation of Siberia	06 Jul 1910
59.70000	30.43400	Russia	Leningrad Prov.	Gatchina	Barovsky	18 Jun 1921
59.96700	29.24800	Russia	Leningrad Prov.	Chernaya Lakhta	Mazarakiy	04 Aug 1899
59.55000	30.10000	Russia	Leningrad Prov.	Gatchina	Barovsky	18 Jun 1921
59.76666	30.10000	Russia	Leningrad Prov.	Gorelovo	Novotvortsev	11 Jul 1898 - 12 Jul 1898
59.90000	30.20000	Russia	Leningrad Prov.	Kanonerskiy Island, St Petersburg	K. I. Fadeev	26 Aug 2018
60.03300	29.98200	Russia	Leningrad Prov.	Kaupilovo [Kaypolovo], nr Gorskaya	Birulya	08 Jul 1897
58.97361	29.32972	Russia	Leningrad Prov.	Kharlamova Gora	Bikhner	14 Jun 1898 - 18 Jun 1898
58.80000	29.94900	Russia	Leningrad Prov.	Krupeli	Mazarakiy	16 Jun 1898
59.93333	34.98333	Russia	Leningrad Prov.	Lakhta, Petrograd Prov.	Jachevski	12 Jul 1918
59.93333	29.41666	Russia	Leningrad Prov.	Lebyazhye	Bianchi	1897-1900
59.91667	30.31667	Russia	Leningrad Prov.	Lesnoy park, Petrograd	Jachevski	21 Aug 1918
60.21670	31.80000	Russia	Leningrad Prov.	Ligovo, Baltiyskaya Railway	Jakobson	1909-07-22
60.01666	29.98333	Russia	Leningrad Prov.	Lisiy Nos [Razdel'naya St.]	A. N. Kiritshenko	16 Jul 1911
59.81700	30.93200	Russia	Leningrad Prov.	Lobanovo	Barovsky	Jul- Aug 1920
59.81556	30.93167	Russia	Leningrad Prov.	Lobanovo dock, Moyka river	Barovsky	05 Jul 1917
59.91300	29.79300	Russia	Leningrad Prov.	Lomonosov [Oranienbaum]	Jachevski	09 Aug 1918
59.73300	29.40100	Russia	Leningrad Prov.	Lopukhinka	Bianchi	Jul-Aug 1894
59.71800	30.09900	Russia	Leningrad Prov.	Mozhayskiy [Dudergof]	F. K. Lukjanovitsh	15 Jul 1935
59.86666	29.91666	Russia	Leningrad Prov.	Novyy Petergof [Petrodvorets]	Chekini	Jun-Aug 1895
59.99600	30.15400	Russia	Leningrad Prov.	Olgino	Binachi	1902-1904
59.80556	30.82778	Russia	Leningrad Prov.	Ostrovki, Vsevolozhskiy distr.	Jakobson	Jun 1906
59.66667	30.40278	Russia	Leningrad Prov.	Popovka (Pavlovsk)	Mazarakiy	30 Jul 1898
59.71666	30.40000	Russia	Leningrad Prov.	Pushkin [Tsarskoe Selo]	Dyakonov	27 Jul 1919
58.65056	29.84000	Russia	Leningrad Prov.	Rakovichi, 7 verst S of Luga	Pleske	27 Jun 1897-29 Jun 1897
59.36666	28.60000	Russia	Leningrad Prov.	Romanovka nr Kingisepp [Yamburg]	Barovsky	1905-06-16
59.61667	30.73333	Russia	Leningrad Prov.	Sablino	A. N. Kiritshenko	25 Jun 1920
59.43333	28.31667	Russia	Leningrad Prov.	Serezhino	Bianchi	1895-1896
59.43400	33.76500	Russia	Leningrad Prov.	Sergievo	O. John	27 Jul 1908
59.60000	31.15000	Russia	Leningrad Prov.	Shapki [Khimozi] nr Gatchina	F. K. Lukjanovitsh	7 Aug 1940
60.01872	30.34076	Russia	Leningrad Prov.	St Petersburg, "Sosnovka" park	K. I. Fadeev	13 Jul 2019
59.96666	30.25000	Russia	Leningrad Prov.	St.Peterburg, Krestovskiy Island	Jakobson	22 Jul 1904
59.66666	30.11666	Russia	Leningrad Prov.	Taytsy, Tsarskoselskiy Dist.	A. A. Stackelberg	11 Jul 1908
60.01600	30.31800	Russia	Leningrad Prov.	Udel'naya	R. I. Virketis, Knyazhetskiy	1917, 1933
60.20100	29.70200	Russia	Leningrad Prov.	Zelenogorsk [Terioki]	Novotortsev	13-14 Jul 1899
55.70000	35.55000	Russia	Moscow Prov.	Porech'ye	Bianchi	10 Jun 1903
67.12402	32.70378	Russia	Murmansk Prov.	2 km N of Luvenga vil.	Namyatova, V. Tyts, A. Vodopyanova	26 Jul 2021
67.13866	32.61020	Russia	Murmansk Prov.	6 km WNW from Luvenga vil.	Namyatova, V. Tyts, A. Vodopyanova	27 Jul 2021
67.08300	32.44100	Russia	Murmansk Prov.	8 km SSE of Kandalaksha	Dmitriev	25 Jul 2001
67.14058	32.75948	Russia	Murmansk Prov.	ap. 4km NNW from Luvenga vil., slopes of Luvengskie Tundry Mt	Namyatova, V. Tyts, A. Vodopyanova	30 Jul 2021
67.08496	33.01694	Russia	Murmansk Prov.	ap. 700m E from Kolvitsa vil., N bank of Kolvitsa River	Namyatova, V. Tyts, A. Vodopyanova	28 Jul 2021
69.12532	36.05905	Russia	Murmansk Prov.	Dal'nie Zelentsy, 150 m NNE from Promernoe Lake towards Yarnyshnyi Cape	A. Namyatova	01 Jul 2018
69.11664	36.08616	Russia	Murmansk Prov.	Dal'nie Zelentsy, ca. 350 m E from village along Zelenetskaya Bay	A. Namyatova	31 Jul 2018
69.12069	36.06136	Russia	Murmansk Prov.	Dal'nie Zelentsy, E coast of Promernoe Lake	A. Namyatova	29 Jul 2018
69.11019	36.07885	Russia	Murmansk Prov.	Dal'nie Zelentsy, village along road	A. Namyatova	31 Jul 2018
69.11654	36.06391	Russia	Murmansk Prov.	Dal'nie Zelentsy, village along seashore	A. Namyatova	30 Jul 2018
67.66056	33.73389	Russia	Murmansk Prov.	Forest near moraine in Kukisvumchorr	Fridolin	23 Aug 1932
67.10363	32.69868	Russia	Murmansk Prov.	Kandalakshskiy Nat Reserve, base nr Luvenga vil.	A. Namyatova, V. Tyts, A. Vodopyanova	24 Jul 2021
67.10687	32.70522	Russia	Murmansk Prov	NW border of Luvenga vil.	A. Namyatova, V. Tyts, A. Vodopyanova	26 Jul 2021
56.20395	43.87267	Russia	Nizhegorod Prov.	Novinki	Formozov	1929
55.65000	43.60000	Russia	Nizhegorod Prov.	Staraya Pustyn	A. N. Kiritshenko	17 Aug 1939
42.80660	43.95190	Russia	North Ossetia Rep.	Tsey, Vladikavkaz Distr.	A. N. Kiritshenko	1939-08-20
43.01666	44.66666	Russia	North Ossetia Rep.	Vladikavkaz	Demokidov	26 Jun 1899
59.28600	31.57100	Russia	Novgorod Prov.	Tigoda River	Semenov	11 Jun 1905
58.65000	32.78333	Russia	Novgorod Prov.	Oksochi, Oktyabr'skaya Railway Station	Gudim	19 Jul 1926-28 Jul 1926
54.20000	52.86666	Russia	Orenburg Prov.	Pavlovka [former Bugul'ma uezd of Samara government]	Elachich	1908-07-30
43.23056	131.98028	Russia	Primorsky Terr.	Between Sedanka and Okeanskaya, nr Vladivostok	Kotelnikov	28 Jun 1913
43.15000	131.78333	Russia	Primorsky Terr.	Charrakh River, Amursky Bay	Chernavin, Soldatov	1907, 1915
44.33333	132.56666	Russia	Primorsky Terr.	Chernigovka	A.F. Emeljanov	14 Jul 1913
43.18333	133.21666	Russia	Primorsky Terr.	Fanza St., Suchan Dist., Ussuriysk Prov.	Rostovykh	1926-07-15
43.68340	132.15920	Russia	Primorsky Terr.	Gornotaezhnoe Station (GTS)	A. Tokareva	25 Aug 2018
42.82750	132.89944	Russia	Primorsky Terr.	Kamenka river, tributary of Komarovka [Suputinka] river	Samoylov	26 Jul 1935
43.06700	131.61700	Russia	Primorsky Terr.	Kedrovaya Pad' Nature Reserve	Kovalev	30 Aug 1962
42.90000	133.70000	Russia	Primorsky Terr.	Kievka [Sudzukhe] river	Sharov	June-July 1948
43.78000	131.95000	Russia	Primorsky Terr.	Komarovka [Suputinka] river	Kolomnets	17 Jul 1964
43.26666	134.05000	Russia	Primorsky Terr.	Kordon Amerika, Lazovskiy Dist.	Yu. Sundukov & Shokhrin	Aug-Sep 2006
44.26528	131.69194	Russia	Primorsky Terr.	Middle stream of Suputinka River, tributary of Suyfun River	Samoylov	26 Jul 1935
42.80000	132.88333	Russia	Primorsky Terr.	Nakhodka, coast of Sea of Japan	I. M. Kerzhner	20 Aug 1959
45.80011	135.46531	Russia	Primorsky Terr.	National Park "Udegeyskaya Legenda", basecamp "Ust-Armu"	A. Ovchinnikov	2009-07-23
43.68900	134.19800	Russia	Primorsky Terr.	Oblachnaya Mt	I. M. Kerzhner	12 Aug 1963
43.23528	132.00694	Russia	Primorsky Terr.	Okeanskaya Railway Station nr Vladivostok	Berger, Fal'kovich	1911, 1913, 1959
43.21806	131.95194	Russia	Primorsky Terr.	Sedanka nr Vladivostok	Rostovykh, Sycheva	1912, 1925
43.13889	132.80917	Russia	Primorsky Terr.	Suchan [Partizansk], head of Sitsa [Tigrovaya] river	Kurentsov	1935
43.16666	132.88333	Russia	Primorsky Terr.	Tigrovoy [Tigrovaya]	Rostovykh	Jul 1928
46.20000	134.40000	Russia	Primorsky Terr.	Vinogradovka	A. N. Kiritshenko	27 Jul 1929
43.11666	131.90000	Russia	Primorsky Terr.	Vladivostok	Berger, Malkova-Panina	1911
56.16597	28.31539	Russia	Pskov Prov.	Sebezhskiy National Park	V. D. Tyts	03 Jul 2019
53.91666	39.50000	Russia	Ryazan Prov.	Gremyachka	Semenov	1902-1912
54.50000	39.50000	Russia	Ryazan Prov.	Sten'kino	Bianchi	07 Jul 1913
47.03333	142.71666	Russia	Sakhalin Prov.	8 km N Yuzhno-Sakhalinsk	Kuporosov	27 Jul 1973
43.91667	145.52500	Russia	Sakhalin Prov.	Alekhino, Kunashir Island	Ermolenko, I.M. Kerzhner	1965, 1973
46.71500	142.52600	Russia	Sakhalin Prov.	Aniva, southern Sakhalin	Ermolenko	16 Aug 1973
43.73333	145.55000	Russia	Sakhalin Prov.	Dubovoe nr Golovnino, Kunashir Island	I. M. Kerzhner, Yu. Sundukov and L. Sundukova	01 Sep 1973, 2017
44.81611	147.41972	Russia	Sakhalin Prov.	Iturup, Burevestnik - Lesozavodskoye	Krivolutskaya	27 Aug 1961
47.03333	142.03333	Russia	Sakhalin Prov.	Kholmskiy Dist., Southern Sakhalin	Kuporosov	19 Jul 1973
53.71600	142.88200	Russia	Sakhalin Prov.	Kolendo [Kalendo], Shmidt peninsula	Ermolenko	1978-08-26
46.61666	142.76666	Russia	Sakhalin Prov.	Kunashir Island, coast of Pacific ocean near Kosmodemyansk	N. A. Azarova	27 Aug 1964
45.08333	147.68333	Russia	Sakhalin Prov.	Kuybyshevka [Rubetsu] River, Iturup Island	Konakov	1946-08-23
44.06000	145.75000	Russia	Sakhalin Prov.	Lagunnoe Lake, West of Yuzno-Kuril'sk	Krivolutskaya	27 Jul 1961
47.00000	142.70000	Russia	Sakhalin Prov.	Novoaleksandrovsk, South Sakhalin	I. M. Kerzhner, Lotkin, Kerzhner, Kanyukova	1973, 1978
44.33667	146.00056	Russia	Sakhalin Prov.	NW Kunashir, Severyanka river mouth	Yu. Sundukov	19 Aug 2017
47.00694	142.84222	Russia	Sakhalin Prov.	Sakhalin Island, Chekhova gora [=Mt.]	Kuporosov	Aug 1973
43.85000	146.81666	Russia	Sakhalin Prov.	Malokurilskoe, Shikotan Mt., Shikotan Island	I. M. Kerzhner	20 Aug 1973
43.86666	146.80000	Russia	Sakhalin Prov.	Shikotan Isalnd, Road from Malokuril'skoe to Kray Sveta Cape	Krivolutskaya	27 Aug 1963
43.98889	145.64167	Russia	Sakhalin Prov.	Tret'yakovo, Kunashir Island	I. M. Kerzhner, Narchuk	1971-1973
43.88333	42.71666	Russia	Stavropol Prov.	Kislovodsk, North Caucasia	Bartenev	15 Jul 1914
44.03222	42.86861	Russia	Stavropol Prov.	Podkumok river near Essentuki	Bartenev	06 Aug 1914
44.13333	43.01666	Russia	Stavropol Prov.	Zheleznovodsk, Caucasia	Artobolevskiy	Jul 1913
54.84639	60.63639	Russia	Sverdlovsk Prov.	Barsuki	K. I. Fadeev	2021-07-02
60.69000	60.44200	Russia	Sverdlovsk Prov.	Petropavlovskaya Sopka, Ivdel Distr.	Belonogov	31 Jul 1946
60.15000	59.93333	Russia	Sverdlovsk Prov.	Severouralsk [former Petropavlovskoye]	Belonogov	1946-08-10
56.42400	84.96900	Russia	Tomsk Prov.	Tom' River, 8 verst from Tomsk	Shafir	1901-07-03
51.40000	92.20000	Russia	Tuva Rep.	45 km E of Chadan, nr Ak-Durug, Chaa-Khol River	S. Belokobylskij	06 Aug 2009-07 Aug 2009
51.11800	91.61500	Russia	Tuva Rep.	Khondergey [Khendergey], valley of Chadan River	Cherepanov	24 Jul 1948
51.26667	91.40000	Russia	Tuva Rep.	Ulug-Khondergey River, Tannu-ola Mt range	Cherepanov	15 Jul 1949
57.86666	34.05000	Russia	Tver Prov.	Bologoe	Unknown	17 Jun 1903
58.39500	33.91100	Russia	Tver Prov.	Borovichi	A. Vlasov	09 Jun 1905
57.97333	34.75639	Russia	Tver Prov.	Udomelsky District	A.G. Korobkov	22 Jun 2014
59.36000	39.63000	Russia	Vologda Prov.	Spasskoye-Kurkino vill.	L.I. Bogdanova-Katkova	01 Jul 1921
51.66666	41.61666	Russia	Voronezh Prov.	Savala forestry, Ternovka	Stark	1953-08-04
65.92278	150.74167	Russia	Yakutia Rep.	Kolyma, 25 km lower Zyryanka vill.	N.N. Vinokurov	14 Jul 1973
62.01666	129.71666	Russia	Yakutia Rep.	Nr Yakutsk	B. Tol'	25 Jul 1893-10 Aug 1893
60.23333	130.03333	Russia	Yakutia Rep.	Tumullur-Anna, Path on Amga River	Bianchi	25 Jul 1925
63.45278	120.31028	Russia	Yakutia Rep.	Verkhnevilyuysk, Vilyuy river	Expedition of Yakut Museum	26 Jul 1927
57.48200	40.10000	Russia	Yaroslavl Prov.	Berditsino	Unknown	18 Aug 1894
58.08900	40.18800	Russia	Yaroslavl Prov.	Zhedenevo	Shestakov	1915
52.03333	113.45000	Russia	Zabaikalsky Terr.	Chita (Kaydalovka River, Chita )	Redikortseva	1912, 1920
46.63823	8.30220	Switzerland		Oberwald, Rhonequelle	Wyniger, Schuh, et al.	26 Jul 2006
46.54396	8.35675	Switzerland		Oberwald, Rhonequelle	Wyniger, Schuh, et al.	27 Jul 2006
51.06666	25.11666	Ukraine		Bol'shoy Porsk, Kovel'skiy Dist., Bolynskaya Prov.	Miyakovskaya	10 Jun 1915-12 Jun 1915
48.28800	25.95900	Ukraine		Chernivtsi [Chernovtsy]	I. M. Kerzhner	25 Sep 1960
50.68000	24.24000	Ukraine		Gribovitsa [Chernyakovo], Ostrozhskiy Uezd, Volynskaya Gov.	Neklyudov	01 Jul 1900-05 Jul 1900
49.04000	32.10000	Ukraine		Kamenka Chigirin Uezd, Kiev Government	Luchnik	no date provided
49.41666	26.98333	Ukraine		Khmel'nitskiy [Proskurov], Podol'skaya Guberniya	Zubovskiy	04 Jun 1896
50.28333	26.86666	Ukraine		Slavuta	Zaytsev	04 Jul 1911
50.46666	34.96666	Ukraine		Trostyanets, Sumskaya Dist.	S. I. Medvedev	13 Jun 1946
48.45000	24.53333	Ukraine		Yaremcha	Farka	09 Jul 1974
51.71877	-1.24105	United Kingdom		Kennington, Berks.	G. E. Scudder	15 Jul 1960
62.546	22.483	Finland		Kurikka, Marmori	Teemu Rintala	03 Aug 2007	MZ610999
68.644	27.227	Finland		Inari, Naverniemi (ranta)	Teemu Rintala	30 Jul 2010	MZ609401
62.1214	25.6616	Finland		Muurame, Valkeapohja	Teemu Rintala	09 Jul 2008	MZ607727
37.71	128.71	South Korea			J.G. Kim	25 Jul 2016	KY367134, KY367135
35.32	126.66	South Korea			J.G. Kim	31 Jul 2014	KY367133
69.8053	23.4894	Norway		Finnmark, Alta, Gargia, Gargia fjellstue	Stephen Roth	30 Jul 2010	KM287239
44.13	7.09	France		Parc National du Mercantour		no date provided	KJ541601, KJ541602, KJ541603
47.934	9.538	Germany		Baden-Wuerttemberg, Altshausen	Anne Kittsteiner	21 Jun 2010	KM022925
53.243	8.204	Germany		Niedersachsen, Rastede	Michael Raupach	26 Jun 2011	KM022658
49.086	7.723	Germany		Rhineland Palatinate, Fichbach bei Dahn	Martin Gossner	09 Oct 2011	KM022481
51.128	10.38	Germany		Thuringia, Hainich-Duen	Martin Gossner	01 Sep 2010	KM022360
54.2167	9.7	Germany		Schleswig-Holstein, Lindhof bei	T. Haye	10 Jul 2001	HQ105868, HQ105869
51.71877	-1.24105	United Kingdom		Kennington, Berks.	G. E. Scudder	15 Jul 1960
41.386122	41.854106	Turkey		Kara Göl		2015	https://www.inaturalist.org/observations/137946664
43.724382	-7.757495	Spain		A Coruña		2017	https://www.inaturalist.org/observations/69404776
45.426904	4.931027	France		Isère, Rhône-Alpes		2017	https://www.inaturalist.org/observations/19088945
44.967869	6.504138	France		Le Monêtier-les-Bains		2015	https://www.inaturalist.org/observations/70830154
48.71972	-3.08612	France		Plourivo		2022	https://www.inaturalist.org/observations/146646363
48.925694	-0.450756	France		Saint-Omer		2015	https://www.inaturalist.org/observations/20012298
48.920508	3.163727	France		Saint-Cyr-sur-Morin		2013	https://www.inaturalist.org/observations/105667853
48.385737	2.798743	France		Veneux-les-Sablons, France		2021	https://www.inaturalist.org/observations/92388880
45.302658	6.220915	France		Saint-Colomban-des-Villards		2022	https://www.inaturalist.org/observations/148545136
45.370652	6.343561	France		Montaimont, 73130 Saint-Colomban-des-Villards		2022	https://www.inaturalist.org/observations/148545136
45.419652	6.144491	France		Arvillard		2023	https://www.inaturalist.org/observations/177715792
45.476522	6.187194	France		La Table		2022	https://www.inaturalist.org/observations/148501549
45.70645	6.619327	France		Beaufort		2022	https://www.inaturalist.org/observations/144537355
46.223827	5.79693	France		Champfromier		2023	https://www.inaturalist.org/observations/147844265
50.072014	2.545942	France		Acheux-en-Amiénois, Picardie		2017	https://www.inaturalist.org/observations/27142658
50.757667	2.327376	France		Clairmarais		2022	https://www.inaturalist.org/observations/147480009
50.788854	2.476646	Nederland		Leidschendam		2022	https://www.inaturalist.org/observations/136488539
50.974093	1.928808	France		Marck		2022	https://www.inaturalist.org/observations/180809750
50.983698	2.281213	France		Dunkerque		2022	https://www.inaturalist.org/observations/146557503
50.486664	3.654496	Belgique		Bernissart		2022	https://www.inaturalist.org/observations/141380123
50.551458	5.098639	Germany		Héron		2021	https://www.inaturalist.org/observations/166806799
46.922429	7.439883	Germany		Bern, CH		2021	https://www.inaturalist.org/observations/144846703
51.598134	5.373851	Netherlands		De Geelders, Boxtel, North Brabant		2022	https://www.inaturalist.org/observations/134871739
51.625586	5.133489	Netherlands		Zandleij, Udenhout, North Brabant		2022	https://www.inaturalist.org/observations/119982984
51.849723	5.030691	Netherlands		Lingebos, Vuren, Gelderland		2021	https://www.inaturalist.org/observations/120130603
51.95313	4.992976	Netherlands		Lexmond, Lexmond, Zuid-Holland		2022	https://www.inaturalist.org/observations/94186907
52.086874	4.385249	Netherlands		Leidschendam		2021	https://www.inaturalist.org/observations/132971128
52.204154	5.26425	Netherlands		Baarn		2021	https://www.inaturalist.org/observations/95034044
47.564579	11.095195	Germany		Ettal, Garmisch-Partenkirchen, Bayern		2020	https://www.inaturalist.org/observations/152279052
50.7647	6.0412	Germany		Aachen		2021	https://www.inaturalist.org/observations/121574820
50.759017	6.174397	Germany		Rhein-Sieg-Kreis		2022	https://www.inaturalist.org/observations/122218962
51.526227	7.265273	Germany		Herne, Nordrhein-Westfalen		2021	https://www.inaturalist.org/observations/123153466
51.966219	7.606875	Germany		Försterstr.		2022	https://www.inaturalist.org/observations/82286660
51.368018	8.795887	Germany		Diemelsee		2022	https://www.inaturalist.org/observations/84946477
51.770598	10.648161	Germany		Wernigerode, Tyskland		2022	https://www.inaturalist.org/observations/131513906
50.845211	12.947558	Germany		Hilbersdorf, Chemnitz		2022	https://www.inaturalist.org/observations/122322466
51.063948	13.651243	Germany		Mobschatz, Dresden		2015	https://www.inaturalist.org/observations/92260076
55.247671	9.524426	Denmark		Starup Hede		2022	https://www.inaturalist.org/observations/132653300
55.261685	9.528195	Denmark		Haderslev, 6100 Haderslev		2008	https://www.inaturalist.org/observations/123099585
55.505316	8.525456	Denmark		Esbjerg Ø		2020	https://www.inaturalist.org/observations/47619360
55.485481	8.572645	Denmark		Tjæreborg		2022	https://www.inaturalist.org/observations/88855734
56.236434	10.292488	Denmark		Midtjylland		2007	https://www.inaturalist.org/observations/90324955
46.656136	15.522817	Austria		Styria, Glanz 74, Biohof Gunczy		2022	https://www.inaturalist.org/observations/54890397
47.049644	15.490119	Austria		St. Peter, Graz		2022	https://www.inaturalist.org/observations/127009983
47.106514	15.948094	Austria		Hartberg-Fürstenfeld		2022	https://www.inaturalist.org/observations/144691085
47.230509	16.075748	Austria		Wörth an der Lafnitz		2021	https://www.inaturalist.org/observations/142087673
48.137648	16.29141	Austria		Liesing, 1230 Wien		2011	https://www.inaturalist.org/observations/120998317
48.852792	15.876574	Austria		Einsiedler, Leuchtgerät, unterster Standort Wald (PF3)		2022	https://www.inaturalist.org/observations/84914904
47.918583	19.832196	Hungary		Csörgő-patak		2022	https://www.inaturalist.org/observations/149856426
49.253774	19.914629	Poland		Zakopane		2021	https://www.inaturalist.org/observations/148978964
54.095262	28.329381	Belarus		Zhodino		2019	https://www.inaturalist.org/observations/134754066
55.350622	10.433794	Denmark		Odense SØ		2022	https://www.inaturalist.org/observations/127287665
55.331343	11.653893	Denmark		Glumsø		2023	https://www.inaturalist.org/observations/167663874
55.291224	11.80269	Denmark		Herlufmagle		2014	https://www.inaturalist.org/observations/150560825
55.722318	12.502752	Denmark		Copenhagen, Hovedstaden		2020	https://www.inaturalist.org/observations/1721672
56.447324	12.754522	Sweden		Troentorp		2021	https://www.inaturalist.org/observations/134350711
59.266416	15.108398	Sweden		Lindbacka, Örebro		2022	https://www.inaturalist.org/observations/167093342
59.840531	10.413611	Norway		Asker Municipality		2021	https://www.inaturalist.org/observations/145354745
63.821335	16.584159	Sweden		Sollefteå, Suède		2022	https://www.inaturalist.org/observations/142846086
63.839542	23.086008	Finland		Santahaka Kokkola		2014	https://www.inaturalist.org/observations/70376189
60.406263	23.1376	Finland		Salo		2022	https://www.inaturalist.org/observations/127548198
60.176318	24.853759	Finland		Lehtisaari, Helsinki		2022	https://www.inaturalist.org/observations/132969205
60.22336	25.038939	Finland		Helsinki		2023	https://www.inaturalist.org/observations/185234388
60.228808	25.121155	Finland		Helsinki		2022	https://www.inaturalist.org/observations/55588065
50.276159	-4.17062	UK		Devon, England		2013	https://www.inaturalist.org/observations/178368056
50.39982	-4.158169	UK		Plymouth, England		2021	https://www.inaturalist.org/observations/92026921
50.596006	-3.679468	UK		Bovey Tracey, Newton Abbot TQ13		2018	https://www.inaturalist.org/observations/9090751
51.457756	-2.602731	UK		Bristol BS8		2019	https://www.inaturalist.org/observations/30875784
51.463185	-2.321614	UK		Marshfield High Street, Chippenham		2016	https://www.inaturalist.org/observations/86869961
51.461611	-1.085967	UK		Berkshire		2016	https://www.inaturalist.org/observations/160076829
50.807156	-0.471465	UK		Kingston, East Preston		2022	https://www.inaturalist.org/observations/121860237
50.870933	-0.107703	UK		Stanmer Park, Brighton		2022	https://www.inaturalist.org/observations/133626920
51.092438	0.241611	UK		Eridge Old Park, Frant		2019	https://www.inaturalist.org/observations/31775521
51.156234	0.356686	UK		Kent		2010	https://www.inaturalist.org/observations/125800852
51.446125	-0.31343	UK		Richmond, England		2018	https://www.inaturalist.org/observations/15870665
51.50038	-0.344752	UK		Warren Farm Nature Reserve, Southall		2022	https://www.inaturalist.org/observations/163123279
52.101463	0.07857	UK		Cambridgeshire, Englan		2021	https://www.inaturalist.org/observations/83295255
51.574614	-3.34594	UK		Wales		2021	https://www.inaturalist.org/observations/93488667
51.912876	-2.631757	UK		Peterstow, Ross-on-Wye HR9 6JX, Verenigd Koninkrijk		2019	https://www.inaturalist.org/observations/32154532
52.121026	-2.337676	UK		Clock Tower, Malvern		2019	https://www.inaturalist.org/observations/29306072
52.643003	-2.874939	UK		Earls Hill Nature Reserve, Shropshire		2022	https://www.inaturalist.org/observations/124956509
52.716232	-2.758002	UK		Gravel Hill Lane River path, Shrewsbury		2020	https://www.inaturalist.org/observations/66753321
52.707496	-2.419335	UK		Muxton, Telford		2022	https://www.inaturalist.org/observations/127121468
51.44365	-0.327508	UK		River Thames, Twickenham, England		2018	https://www.inaturalist.org/observations/15331675
51.331775	-0.534045	UK		Woking		2017	https://www.inaturalist.org/observations/9100704
51.981608	-0.146678	UK		Clothall, Baldock, England		2021	https://www.inaturalist.org/observations/95788054
52.487401	0.987795	UK		England		2022	https://www.inaturalist.org/observations/132338421
52.624496	1.502098	UK		South Burlingham, Norwich NR13 4FA		2020	https://www.inaturalist.org/observations/57428801
53.558657	-3.055116	UK		Formby, Liverpool L37		2021	https://www.inaturalist.org/observations/84989897
53.778178	-2.724758	UK		Lythcoe Ave, Preston, England		2021	https://www.inaturalist.org/observations/85888932
53.238541	-2.134512	UK		Macclesfield		2022	https://www.inaturalist.org/observations/127105862
53.256147	-1.771707	UK		Derbyshire		2021	https://www.inaturalist.org/observations/93683192
53.525831	-2.200953	UK		Manchester M9		2021	https://www.inaturalist.org/observations/92468472
53.239443	-1.468774	UK		England		2022	https://www.inaturalist.org/observations/122368085
53.315929	-1.414141	UK		England		2022	https://www.inaturalist.org/observations/124439519
53.363916	-1.456744	UK		England		2022	https://www.inaturalist.org/observations/122782626
53.435126	-1.407002	UK		England		2021	https://www.inaturalist.org/observations/86718388
53.561077	-1.472356	UK		Barnsley		2022	https://www.inaturalist.org/observations/122853955
53.821244	-1.648856	UK		Leeds LS13 1AA		2021	https://www.inaturalist.org/observations/99114488
53.657491	-1.569374	UK		Horbury, Wakefield		2022	https://www.inaturalist.org/observations/124870459
54.159247	-1.026848	UK		North Yorkshire		2021	https://www.inaturalist.org/observations/85804225
54.08968	-1.004407	UK		Sheriff Hutton, York YO60		2020	https://www.inaturalist.org/observations/50418601
53.962717	-0.982697	UK		Owlwood Lane, York, England		2022	https://www.inaturalist.org/observations/122357009
53.782668	-0.323097	UK		Hull HU7		2022	https://www.inaturalist.org/observations/130820975
54.938032	-1.722799	UK		Lockhaugh Road, Rowlands Gill NE39 1AU		2014	https://www.inaturalist.org/observations/8910940
54.839475	-3.050862	UK		Cumbria		2022	https://www.inaturalist.org/observations/122635952
56.048198	-2.718957	UK		North Berwick		2022	https://www.inaturalist.org/observations/130623033
55.902769	-2.789789	UK		Bolton Muir Wood		2014	https://www.inaturalist.org/observations/40880341
55.890119	-2.894046	UK		Glenkinchie		2010	https://www.inaturalist.org/observations/40886395
55.87477	-3.105353	UK		Midlothian		2021	https://www.inaturalist.org/observations/92120822
55.921136	-3.249482	UK		Edinburgh		2022	https://www.inaturalist.org/observations/130215365
55.913259	-3.438552	UK		West Lothian		2022	https://www.inaturalist.org/observations/126725473
55.867888	-4.098478	UK		Lochdochart Road, Glasgow, Scotland		2022	https://www.inaturalist.org/observations/133958166
56.13327	-3.760813	UK		Clackmannanshire		2021	https://www.inaturalist.org/observations/86861843
57.45617	-2.306747	UK		Aberdeenshire		2022	https://www.inaturalist.org/observations/128694514
54.557061	-5.927424	UK		Lisburn and Castlereagh		2019	https://www.inaturalist.org/observations/29529252
53.168293	-6.520097	UK		Knockieran Lower, Red Lane, Co. Wicklow, Ireland		2021	https://www.inaturalist.org/observations/89404957
53.370352	-9.162392	UK		Gortachalla, Galway		2018	https://www.inaturalist.org/observations/151627107
55.045753	32.693335	Russia	Smolensk Prov.	Yartsevskiy Dist, Smolenskaya Prov.		2022	https://www.inaturalist.org/observations/135417032
61.610472	34.444103	Russia	Karelia Rep.	Prionezhskiy Dist		2016	https://www.inaturalist.org/observations/19034231
58.543232	50.013157	Russia	Kirovsk Prov.	Kirovo-Cheptsk		2016	https://www.inaturalist.org/observations/37328960
55.920428	92.730727	Russia	Krasnoyarsk Terr.	Berezovskiy rayon		2022	https://www.inaturalist.org/observations/128039480
37.812801	128.113419	South Korea				2022	https://www.inaturalist.org/observations/139979420
37.164065	128.985565	South Korea				2019	https://www.inaturalist.org/observations/28966475
56.092389	38.178469	Russia	Moscow Prov.	Pushkinsk Dist		2010	https://www.inaturalist.org/observations/9156022
55.831806	37.289719	Russia	Moscow Prov.	Krasnogorsk		2022	https://www.inaturalist.org/observations/124173733
48.847943	17.372018	Czech Republic		Radìjov, Holý vrch hill		2012	Kment & Baňař, 2012
49.089695	18.022178	Czech Republic		Valašské Klobouky, Brumovka (= Kloboucký potok)		2012	Kment & Baňař, 2012
54.014444	108.237778	Russia	Irkutsk Prov.	Baikalo-Leninskiy NR		2007-2010, 2013	Sofronova, E. V. (2017)
49.690078	18.928256	Poland		Stary Gron	Matuszczyk, J & Taszakowski, A., 2017	2015
46.782295	17.366053	Hungary		Balatongyörökön, Bece-hegyi	Kondorosy, E., 2011	1999-2003
46.906084	17.259405	Hungary		Zalaszántó (Tátika)	Kondorosy, E., 2011	1999-2003
49.573161	19.530667	Poland		Babia Gora	Lis, B., Masior, J., Lis, J., 2002	1949-1999
50.289838	18.958497	Poland		Chorzow	Lis & Lis, 1998	1900-1998
50.198983	19.038528	Poland		Murcki, Katowice	Lis & Lis, 1998	1900-1998
50.343087	19.542650	Poland		Pustynia Błędowska	Lis & Lis, 1998	1900-1998
50.431521	18.950387	Poland		Świerklaniec	Lis & Lis, 1998	1900-1998
50.333934	18.102698	Poland		Wilczyce	Lis & Lis, 1998	1900-1998
47.5625	14.676389	Austria		Nationalpark Gesäuse	Frieß, T., 2014	2003-2004
50.256666	17.428726	Czech Republic		Biskupia Kopa	Lis, B., & Lis, J., 2002	1996-2001
43.99611	40.13500	Russia	Adygeya Rep.	Guzeripl	Нейморовец, В., 2010	1998-2004
43.722962,	40.129401	Russia	Krasnodar Terr.	Achishkho Mt	Нейморовец, В., 2010	1998-2004
55.462160	40.337269	Russia	Ryazan Prov.	National park Meshchera	Николаева, А. М., 2011	2002-2004
51.537965	104.057617	Russia	Buryatia Rep.	Utulik	Софронова, Е. В., 2015	2013-2014
51.580395	105.246596	Russia	Buryatia Rep.	Pereemnaya	Софронова, Е. В., 2015	2013-2014
45.277630	136.498774	Russia	Primorskiy Terr.	Middle course of Zabolochennaya River	Vinokurov, N. N., Kanyukova, E. V., & Ostapenko, K. A., 2016	2016
44.935370	136.034011	Russia	Primorskiy Terr.	Dzhigitovka River	Vinokurov, N. N., Kanyukova, E. V., & Ostapenko, K. A., 2016	2016
60.416544	59.583258	Russia	Sverdlovsk Prov.	Denezhkin Kamen	Zinovjeva, A. N., & Ermakov, A. I., 2016	2016
59.387621	10.668755	Norway		Telemarkslunden	Hansen, L. O., & Coulianus, C. C., 1998	1992-1993
50.316112	83.820214	Kazakhstan		Ridder Town: Ivanovskiy Mt. Range, 10 km S of Poperechnoe Village	Vinokurov, N. N., Bolbotov, G. A., Gabdullina, A. U., & Rudoi, V. V., 2022	07 Aug 2021
36.715560	126.794687	South Korea		Chungcheongnam-do	Oh, M., Yasunaga, T., Duwal, R. K., & Lee, S., 2018	1900-2018
37.003715	127.680756	South Korea		Chungcheongbuk-do	Oh, M., Yasunaga, T., Duwal, R. K., & Lee, S., 2018	1900-2018
35.453354	128.207887	South Korea		Gyeongsangnam-do	Oh, M., Yasunaga, T., Duwal, R. K., & Lee, S., 2018	1900-2018
34.863401	126.988390	South Korea		Jeollanam-do,	Oh, M., Yasunaga, T., Duwal, R. K., & Lee, S., 2018	1900-2018
43.684983	142.806329	Japan		Mt. Daisetsu	Yasunaga, T., 1991	05 Jul 1955
35.422584	138.139748	Japan		Mt. Hijiri	Yasunaga, T., 1991	19 Sep 1953
35.882291	137.448534	Japan		Mt Ontake	Yasunaga, T., 1991	14 Sep 1953
36.526830	138.403036	Japan		Azumaya Mt	Hayashi, M., & Higashikawa, O., 1997	1980-1996
46.983333	13.216667	Austria		Dösental, Nationalpark Hohe Tauern, Mallnitz, Kärnten	Von Wolfgang Rabitsch, J. B., Markus, B. R. Ä. U., Peyton, M. R., Voigt, K., & Frie, T. 2020	22 Aug 2020
60.29494	73.90657	Russia	Khanty-Mansi Distr.	Yuganskiy NR, cordon Kamenniy	A. Namyatova, V. Tyts, P. Dzhelali	28 Jul 2023
52.40094	92.31636	Russia	Krasnoyarsky Terr.	Sayano-Shushensky NR, cordon Talovka	A. Namyatova, V. Tyts, P. Dzhelali	23 Jul 2023
55.94837	92.78156	Russia	Krasnoyarsky Terr.	Stolby Nature Park, nr cable car station	A. Namyatova, V. Tyts, P. Dzhelali	15 Jul 2023
52.59679	92.16987	Russia	Krasnoyarsky Terr.	Sayano-Shushensky NR, ca. 58 km from Cheryomushki	A. Namyatova, V. Tyts, P. Dzhelali	18 Jul 2023
60.73303	28.72675	Russia	Leningrad Prov.	Vyborg, Monrepos park	A. Namyatova	02 Jul 2023
51.74713	95.42763	Russia	Tyva Rep.	Koptu (Khopto) River	S. Kuzhuget	2022

## Sheet: DataSI1 Lygus punctatus
Data SI1. Raw locality and collection event data for Lygus punctatus used for the ecological niche modelling, PCA and linear modelling analyses
Latitude	Longitude	Country	Province (in Russia)	Locality	Сollector	Date	Genbank accession number or iNaturalist link
51.6511	101.73	Russia	Irkutsk Prov.	Irkut river, downstream Ekhe-Ugun [Ekhe-Ukhgun', Ikhe-Ukhgun'], S Irkutsk. prov.	Gartun	01-02 Aug 1973
58.6506	29.84	Russia	Leningrad Prov.	Rakovichi, 7 verst S of Luga	Pleske	16-26 Jun 1897
59.3667	28.6	Russia	Leningrad Prov.	Romanovka nr Kingisepp [Yamburg]	Barovsky	Jul-Aug 1904
51.55	85.9667	Russia	Altai Rep.	Uznezya on the Katun river	Gorchakovskiy	13-18 Aug 1909
50.753	86.135	Russia	Altai Rep.	Ongudai, Altay	Berezovskiy	30 Jun 1898-01 Jul 1898
60.584	130.011	Russia	Yakutia Rep.	Abyi path to Amgu River	Bianchi	1925-07-22
56.2833	101.717	Russia	Krasnoyarsk	Padun on Verkhnyaya Tunguska River	A. Czekanowski	1867
61.25	46.5167	Russia	Arkhangelsk Prov.	Left bank of Severnaya Dvina River, oppos. Kotlas	Stark	1942-08-04
53.1623	107.368	Russia	Irkutsk Prov.	Ol'khon Is, forest ap. 3.8 km SE from Khuzhir, Serdtse Spring	A. Namyatova	2020-08-19
57.4577	60.7384	Russia	Sverdlovsk Prov.	Nev'yansky city district, Kiprino, Pashkovka River	Unknown	2019-08-24
50.3508	106.449	Russia	Buryatia Rep.	Kyakhta [former Troitskosavsk]	A. Kiritshenko	1926-06-20
58.7333	29.85	Russia	Leningrad Prov.	Luga	Solskiy	1869
62.4	127.5	Russia	Yakutia Rep.	Dukaya [Dzhyukaya] lake, Namskiy ulus	A. Ivanov	1926-08-11
51.9	105.05	Russia	Irkutsk Prov.	Bolshie Koty, SW Bank of Baykal Lake	Kiritshenko	1950-08-11
59.8056	30.8278	Russia	Leningrad Prov.	Ostrovki, Vsevolozhskiy distr.	A. Vlasov	1928-05-27
49.6	39.4667	Russia	Voronezh Prov.	Ternovka [Ternovskiy sovkhoz], Elan'-Kolenovskiy distr.	Unknown	no date provided
54.6681	40.6269	Russia	Ryazan Prov.	Spasskiy dist., near Gorodnoye vill.	A. Nikolayeva	2018-07-22
53.1836	107.338	Russia	Irkutsk Prov.	Ol'khon Is, forest ap. 720m SE from Khuzhir	A. Namyatova	2020-08-16
57.4577	60.7384	Russia	Sverdlovsk Prov.	Nev'yansky city district, Kiprino, Pashkovka River	Unknown	2019-08-24
57.566	62.7157	Russia	Sverdlovsk Prov.	Skorodumskoe	K. Fadeev	21-27 Aug 2019
57.2879	65.1733	Russia	Tyumen Prov.	nr. Molchanovka	K. Fadeev	2019-07-27
51.7428	39.4228	Russia	Voronezh Prov.	Novousmanskiy dist., Shuberskoe	Khitsova	2018-08-03
63.1986	84.3169	Russia	Yamalo-Nenets Distr.	Krasnoselkupskiy nat. res., flood basin of Ratty river, cordon Pyul-Ky	P. Sitnikov	2003-07-08
56.6036	61.0375	Russia	Sverdlovsk Prov	Sysertsky Dist, 3km W of Dvurechensk, Biostation of Ural Federal University	K. Fadeev	2019-08-10
56.5928	61.0975	Russia	Sverdlovsk Prov	Sysertsky Dist, Dvurchensk	K. Fadeev	2019-08-10
56.41	60.5	Russia	Sverdlovsk Prov	Aramil'	K. Fadeev	2019-08-13
51.4	92.2	Russia	Tuva Rep.	45 km E of Chadan, nr Ak-Durug, Chaa-Khol River	S. Belokobylskij	06-07 Aug 2009
57.3795	59.5873	Russia	Sverdlovsk Prov	Kirovgrad District, Visimskiy Nature Reserve, qu. 45, N3	N. Ukhova	2017-05-31
63.1986	84.3169	Russia	Yamalo-Nenets Distr.	Krasnoselkupskiy nat. res., flood basin of Ratty river, cordon Pyul-Ky	P. Sitnikov	2003-07-08
58.8593	8.57353	Norway		Aust-Agder AAi Amli, near Sanda, Nidaelv	S. Roth	2010-08-09
58.171	7.6571	Norway		Vest-Agder VAy Marnadal, Elksa	S. Roth	2010-08-10
51.5603	87.7263	Russia	Altai Rep.	Soolok Mt., E of Teletskoe Lake	Ignatov	1901-06-22
59.9333	34.9833	Russia	Leningrad Prov.	Lakhta, Petrograd Prov.	Miram	1920-06-17
61.285	46.509	Russia	Arkhangelsk Prov.	Shipitsyno, nr Kotlas	Stark	1942-07-13
57.209	94.898	Russia	Krasnoyarsk Terr.	Taseevo, Kansk Distr.	Varaksina	1914-06-21
48.54	110.976	Mongolia		Hentiy Aimak: Onon River SW Kentey	Unknown	no date provided
58.3542	109.668	Russia	Irkutsk Prov.	Irkutsk Prov.: 4 v. [4.27 km] downstream Daryina, between Kirensk and Vitim	Bianchi	1925-09-12
60.857	71.4422	Russia	Khanty-Mansi Distr.	ap. 10km SE Lempino	F. Konstantinov	2022-08-09
63.3764	74.5652	Russia	Yamalo-Nenets Distr.	ap. 26km N Kholmy	F. Konstantinov	2022-08-07
64.2954	75.9198	Russia	Yamalo-Nenets Distr.	ap. 30km SW Gubkinskiy	F. Konstantinov	07 Aug 2022
64.9797	77.6656	Russia	Yamalo-Nenets Distr.	nr Purovskiy	F. Konstantinov	2022-08-02
62.1203	73.7737	Russia	Khanty-Mansi Distr.	ap. 10km ESE Russkinskaya	F. Konstantinov	2022-08-08
60.7502	72.8297	Russia	Khanty-Mansi Distr.	nr Pyt-Yakh	F. Konstantinov	2022-07-30
51.6008	112.933	Russia	Zabaikalsky Terr.	Tataurovo - Karymskoe	D. Smirnov	1907-08-24
60.8	125.067	Russia	Yakutia Rep.	4 verst upstream from Churan [Churanskaya] on Lena River	Bianchi	1925-09-03
63.4403	129.562	Russia	Yakutia Rep.	Khomurgan Arbyn near estuary of Aldan river	Bianchi	1926-06-28
56.507	84.978	Russia	Tomsk Prov.:	Tomsk	Chugunov	13-17 May 1899
52.48	89.21	Russia	Khakassia Rep.	Kayzas River, Tributary of Abakan River	Yu. Wagner	25-28 Jun 1897
59.44	27.95	Estonia		Narva-Yyesuu [Ust'-Narva, Ust'-Narova]	Somina	1909-08-06
53.611	90.501	Russia	Khakassia Rep.	Nemir River nr Abakan	Wagner	11 Jun 1897
57.775	108.122	Russia	Irkutsk Prov.	Kirensk	Braudo	Jun 1904-Jul 1904
54.4	90.15	Russia	Khakassia Rep.	Shira Lake [former Kanskiy Uezd, Yeniseyskaya Gov.]	F.K. Lukjanovitsh	1936-07-17
51.42	106.53	Russia	Irkutsk Prov.	Yagodnaya nr Shchuch'e Lake	Tugarinov	1930-07-16
53.71	87.73	Russia	Kemerovo Prov.	Myski	Fal'kovich	1956-07-05
66.0728	33.0147	Russia	Karelia Rep.	Loukhi	Roshko	1958-07-12
56.0167	93.05	Russia	Krasnoyarsk Terr.	Nr Krasnoyarsk	Rostovykh	1924-06-06
55.9333	99.4667	Russia	Irkutsk Prov.	93 km E Tayshet	Barovsky	1941-05-26
53.96	93.33	Russia	Krasnoyarsk Terr.	Mozharka [Mazharka, Minusinskiy Uezd, Eniseyskaya Gov.]	Serebrennikov	1925-06-20
58.2074	108.97	Russia	Yakutia Rep.	Petropavlovsk [former Petropavlovskoe]	Olenin	1911-07-09
55.75	88.3	Russia	Kemerovo Prov.	Tisul'	Gorchakovskiy	1911-06-16
53.3833	126.517	Russia	Amur Prov.	Ulunga	Mishin, Verkhovskiy	1910-05-24
51	95.198	Russia	Tuva Rep.	Balgazikskiy forest, Tuva Depression	Cherepanov	1948-06-07
53.686	92.053	Russia	Krasnoyarsk Terr.	Kanygino	Serebrennikov	1925-07-16
58.089	40.188	Russia	Yaroslavl Prov.	Zhedenovo	Shestakov	1915
52.0333	113.45	Russia	Zabaikalsky Terr.	Chita	V. Jakovlev	no date provided
59.8	30.968	Russia	Leningrad Prov.	Lobanovo dock, Mednaya [Mustolovo]	Barovsky	1917-07-05
58.1899	68.251	Russia	Tyumen Prov.	Tobolsk	Fridolin	1925-05-20
50.1778	107.43	Russia	Buryatia Rep.	Khamnigaday [Chamnegadaij], Kyakhtinskiy [Troitskosavsk] distr.	F. Lukjanovitsh	1928-06-03
51.861	104.86	Russia	Irkutsk Prov.	Listvyanka [Listvenichnoe], SW of Baikal	A. Kiritshenko	1950-08-21
51.6497	113.969	Russia	Zabaikalsky Terr.	Darasun [between Darasun and Tyret]	Vinogradov	1925-08-18
63.8374	23.1024	Finland		Santahaka Kokkola	iNaturalist	2007	https://www.inaturalist.org/observations/70486494
61.2485	22.8449	Finland		Sastamala, Nevanmaa	iNaturalist	2020	https://www.inaturalist.org/observations/52039884
60.4254	22.3637	Finland		Southwest Finland	iNaturalist	2020	https://www.inaturalist.org/observations/59300055
60.0602	17.1697	Sweden		Heby	iNaturalist	2022	https://www.inaturalist.org/observations/124578131
61.2131	21.7371	Finland		Eurajoki	iNaturalist	2023	https://www.inaturalist.org/observations/168051685
51.4	86.0167	Russia	Altay Rep.	Altay Rep., Chemal	Belokobylskiy	2007
51.4372	94.7626	Russia		40km SW Kyzyl, nr Kyzyl lake	Belokobylskiy	2009
51.1076	86.259	Russia		SW Edigan, Edigan river	Labina	2006
53.2217	124.438	Russia	Amur Prov.	Beytonovo 58,6 km from Dzhalinda	V. Popov	1915-05-31
50.4333	107.267	Russia	Buryatia Rep.	Ungurkuy-Yelan' [Elanskoe]	F. Lukjanovitsh	1928-08-28
53.3333	83.75	Russia	Altai Terr.	Barnaul on the Ob' River	Agentova	1912-06-24
53.0697	102.543	Russia	Irkutsk Prov.	Alar' [Alary], Balaganskiy distr.	Vinogradov	1924-06-10
59.9667	42.75	Russia	Vologda Prov.	Tot'ma	Barovsky	1933-06-18
53.6833	91.6833	Russia	Krasnoyarsk Terr	Minusinsk on Enisey River	Tyutchev	23 Jun 1898
59.55	30.1	Russia	Leningrad Prov.	Gatchina	Unknown	1901-06-12
58.2092	108.972	Russia	Irkutsk Prov.	Petropavlovskoe [Petropavlovskaya volost, Lena, Kirensky uyezd]	Olenin	1905-06-21
59.9333	29.4167	Russia	Leningrad Prov.	Lebyazhye	F. Lukjanovitsh	1930-08-19
61.606	130.236	Russia	Yakutia Rep	13.76 km [13 verst] upstream from Chuya vil., right bank of middle Lena	L. Bianchi	08 Jun 1825
51.575	87.686	Russia	Altai Rep.	Kokshi River, Teletskoe Lake	Ignatov	1901-06-23
58.23	92.495	Russia	Krasnoyarsk Terr.	Lesosibirsk [Maklakhovskoe ]	Malykh	1915-06-12
51.7878	104.216	Russia	Irkutsk Prov.	Marituy, S Baykal	Schubert	17 May 1909
48.433	106.766	Mongolia		Sugu-Nur river, upper course of Khara-Gol River	Kozlov	01 Sep1924
58.7236	30.0622	Russia	Leningrad Prov.	Zherebud [Zherebut]	A. Vlasov	15 Aug 1934
56.8	105.833	Russia	Irkutsk Prov.	Ust'-Kut, left bank of Lena river	A. Ivanov	01 Jun1925
56.394	103.913	Russia	Irkutsk Prov.	Seleznevo, 442 km, Taishet, Lena River	Gorodkov	06 Jun 1957
52.0333	113.55	Russia	Zabaikalsky Terr.	Kaydalovka River, Chita	Valueva	04 Jul .1912
58.0231	108.622	Russia	Irkutsk Prov.	Banshchikovo	Dmitrieva	30 Jul 1911
60.65	121.417	Russia	Yakutia Rep.	Nr Khorintsy, Lena River	N.N. Vinokurov	12 Jul 1972
59.9378	118.896	Russia	Yakutia Rep.	Kochegarovo [Kochegarskaya], Lena river upstream from Olyokminsk	Gubelman	12-20 Jul 1916
62.0339	129.733	Russia	Yakutia Rep.	Yakutsk	Gileva	1926-08-07
60.5	29.2167	Russia	Leningrad Prov.	Lounatioki St., Karelian Isthmus	Mishchenko	1947-08-11
53.7156	91.4292	Russia	Khakassia Rep.;	Minussinskiy Dist, Abakansky factory	Jacobson	17 Jun 1897
52.7	118.8	Russia	Zabaikalsky Terr.	Ust'-Karsk [Ust'-Kara], valley of the Shilka River, Zabaykal'e	Gitelman	1912-07-22
53.0833	91.3833	Russia	Khakassia Rep.	Sayanogorsk [Oznachennaya] on Yenisey River	F. Lukjanovitsh	1930-09-09
54.3553	109.506	Russia	Buryatia Rep.,	Barguzinskiy nature reserve, Davsha village	E.V. Sofronova	2019-07-02
65.9041	29.0315	Finland		Regio kuusamoensis, Kuusamo, Maanselkae	Sami Haapala	2012	MZ656850
65.1284	25.6187	Finland		Ostrobottnia ouluensis, Kiiminki, Alakylae	Sami Haapala	2012	MZ656610
50.36	83.52	Kazakhstan		East Kazakhstan Prov., none, Ivanovskiy Belok near Leninogor [Riddersk]	Vinogradov	1923
67.884	32.756	Russia	Murmansk Prov.	Murmansk Prov., none, 4 km SW of Monchegorsk	D. Dmitriev	2001
54.483	58.281	Russia	Bashkortostan Rep.	Bashkortostan Rep., none, Dvoynishi, nr Katav-Ivanovsk	Vakulenko	1926
51.49	95.555	Russia	Tuva Rep	Saryg-Sep (Znamenka) on Kaa-Khem River	Kalugin	1948
51.1167	94.5	Russia	Tuva Rep	Sosnovka, Turgen River, Foothills of Tannu-Ola Mts. Range	Isanova	1949
51.89	94.01	Russia	Tuva Rep	Veselyy pass, 36 km NW of Kyzyl	Korotyaev	1979
60.717	29.949	Russia	Leningrad Prov.	Sapernoe, Priozersk distr.	Kerzhner	1958
53.0431	141.249	Russia	Khabarovsk Terr.	Ozerpakh	Chernavin	1915
44.95	73.9833	Kazakhstan		10 km S-W of Balkash Lake	Arnoldi	1960
53.7333	127.25	Russia	Amur Prov.	Amur Prov., none, Zeya (town)	Kozhanchikov	1914
58.3361	68.241	Russia	Tyumen Prov.	Tyumen Prov., Durynina vil	Samko	1931
63.1145	131.927	Russia	Amur Prov.	Amur Prov., nr Tanda River crossing	Obolenskiy	1929
55.3074	124.826	Russia	Amur Prov.	Amur Prov., Sigikta, slopes of Stanov Mt Range	Obolenskiy	1928
49.6833	131.285	Russia	Amur Prov.	Amur Prov., none, Salokachi, Valley of Bureya River	Kirichenko	1946
51.132	138.553	Russia	Amur Prov.	nr Litvintsevo, bank of Amur River	Soldatov	1911
54.4402	127.181	Russia	Amur Prov.	Amur Prov., none, Valley of upper Zeya River, bar. Unakha River	Nikoforov	1911
54.7092	128.847	Russia	Amur Prov.	Amur Prov., none, Bomnak, upper course of Zeya river	Unknown	1910-1911
49.2667	142.85	Russia	Sakhalin Prov.	Sakhalin Prov., none, Leonidovo [Kami-shikuka] nr Poronaysk	Dyakonov	1947
61.65	139.37	Russia	Yakutia Rep.	7v downstream Tyuktyurskaya, left bank of Lena River	Ivanov	1926
53.0871	70.3006	Kazakhstan		Borovskoy forest, Kokchet., Akmola River	V. Popov	1932
51.9667	113.567	Russia	Zabaikalsky Terr.	Peschanka nr Chita	Strugalina	1911
52.2333	117.683	Russia	Zabaikalsky Terr.	Sretensk	Kapustin	1928
51.291	85.672	Russia	Altai Rep.	Chuysk Road, nr Shebalino	Yurganova	1911
58.75	28.2	Russia	Pskov Prov.	Shchepets [former Yaz'vo Volost', Gdov Government]	N. Ivanov	1901

## Sheet: references for Data SI1
Frieß, T. (2006). Naturschutzfachliche Analyse der Wanzenfauna (Insecta, Heteroptera) unterschiedlicher Almflächen im Nationalpark Gesäuse (Österreich, Steiermark)
Frieß, T. (2014). Die Wanzenfauna (Insecta: Heteroptera) des Nationalparks Gesäuse (Österreich, Steiermark). Beiträge zur Entomofaunistik, 15, 21-59.
Gessé, F., Goula, M., & Pujade-Villar, J. (1994). Estudi dels heteròpters (Insecta, Heteroptera) capturats amb trampa Malaise a Santa Coloma (Andorra). Sessió Conjunta d’Entomologia ICHN-SCL, 8(1993), 61-80.
Hansen, L. O., & Coulianus, C. C. (1998). Noteworthy records of Heteroptera (Hemiptera) from the middle Oslofjord, SE Norway. Fauna Norvegica Serie B, 45, 69-76.
Hayashi, M., & Higashikawa, O. (1997). Homoptera-Auchenorrhyncha and Heteroptera (Insecta, Rhynchota) from Sugadaira, Central Honshu, Japan. 菅平高原実験センター研究報告, (14), 15-56.
Heckmann, R. , Strauss, G., & Rietschel, S. (2015). Die Heteropterenfauna Kretas. Carolinea, 73, 83-130.
Kment, P. & Baňař, P. (2012). True bugs (Hemiptera: Heteroptera) of the Bílé Karpaty Protected Landscape Area and Biosphere Reserve (Czech Republic). Acta Musei Moraviae, Scientiae Biologicae, 96(2), 323-628.
Kondorosy, E. (2009). Gyűrűfű poloskanépessége (Heteroptera) három Biodiverzitás Nap alapján= Bug Fauna of Gyűrűfű based on the Three Biodiversity Days (Hetereoptera). Natura Somogyiensis, (13), 97-104.
Kondorosy, E. (2011). Heteroptera fauna of Keszthely and vicinity. Folia Musei Historico-Naturalis Bakonyiensis, 28, 105-145.
Lis, B., & Lis, J. (2002). Pluskwiaki różnoskrzydłe (Hemiptera: Heteroptera) Gór Opawskich (Sudety Wschodnie). Wiad. entomol, 21(2), 87-95.
Lis, B., Masior, J., & Lis, J. (2002). Pluskwiaki różnoskrzydłe (Hemiptera: Heteroptera) Babiej Góry (Beskid Zachodni). Wiad. entomol, 20(3-4), 103-111.
Lis, J., & Lis, B. (1998). True-bugs of Upper Silesia–an annotated checklist (Hemiptera: Heteroptera). Annals of the Upper Silesian Museum (Entomology), 8(9), 107-146.
Matuszczyk, J., & Taszakowski, A. (2017). Lądowe pluskwiaki różnoskrzydłe (Hemiptera: Heteroptera) masywu Starego Gronia (Beskid Śląski).
Neimorovets, V. (2010). True Bugs (Heteroptera) of the Krasnodar Territory and the Republic of Adygea. Checklist. Plant Protection News, 1-103.
Nikolaeva, A. M. (2011). Preliminary list of species of terrestrial semi-arthropods (Insecta, Heteroptera) of Meshchera National Park. Proceedings of the PG Smidovich Mordovian State Nature Reserve, (9), 115-124.
Nikolaeva, A. M. (2015). Preliminary results of the study of semi-rigid insects (Insecta, Heteroptera) of the Mordovian Reserve. Proceedings of the PG Smidovich Mordovian State Nature Reserve, (14), 316-322.
Oh, M., Yasunaga, T., Duwal, R. K., & Lee, S. (2018). Annotated checklist of the plant bug tribe Mirini (Heteroptera: Miridae: Mirinae) recorded on the Korean Peninsula, with descriptions of three new species. European Journal of Entomology, 115.
Sofronova, E. V. (2015). To the study of the fauna of semi-rigid-winged insects (Heteroptera) of the northern macro-slope of the Hamar-Daban Ridge (Eastern Siberia). Bulletin of Tomsk State University. Biology, (2 (30)), 82-95.
Vinokurov, N. N., Bolbotov, G. A., Gabdullina, A. U., & Rudoi, V. V. (2022). Addition to the fauna of terrestrial true bugs of the east Kazakhstan province of Kazakhstan (HETEROPTERA: CIMICOMORPHA, PENTATOMOMORPHA).
Vinokurov, N. N., Kanyukova, E. V., & Ostapenko, K. A. (2016). Homoptera (Cicadina) and Heteroptera of the Sikhote-Alin State Nature Biosphere reserve. Amurian zoological journal, 8(4), 233-249.
Von Wolfgang RABITSCH, J. B., Markus, B. R. Ä. U., PEYTON, M. R., VOIGT, K., & FRIE, T. Wanzenfunde (Insecta: Heteroptera) der 46. Tagung der „Arbeitsgemeinschaft Mitteleuropäischer Heteropterologen “im Nationalpark Hohe Tauern, Mallnitz, Kärnten (Österreich)
Yasunaga, T. (1991). A revision of the plant bug genus Lygocoris Reuter from Japan, Part I (Heteroptera, Miridae, Lygus-complex). Japanese Journal of Entomology, 59(2), 435-448.
Zinovjeva, A. N., & Ermakov, A. I. (2016). The true bugs (Heteroptera) of the «Denezhkin Kamen'» nature reserve, Russia. Eurasian Entomological Journal, (15), 193-200.

## Sheet: DataSI2 Pearson correlations
Data SI2. Pearson correlations for the Liocoris tripistulatus, Lygocoris pabulinus and Lygus punctatus. The hight correlations (>90%) are highlighted.
Pearson correlation for Liocoris tripustulatus
	bio01	bio02	bio03	bio04	bio05	bio06	bio07	bio08	bio09	bio10	bio11	bio12	bio13	bio14	bio15	bio16	bio17	bio18	bio19
bio01	1	-0.075294474782867	0.690888888056867	-0.66388191509425	0.500711652136399	0.901670605068191	-0.625973564542339	-0.194842531566941	0.842917177479109	0.673022840627907	0.925427496054521	0.286121400193309	0.312304392166183	0.105115927106626	0.0289764252123883	0.305291239103172	0.157137187001719	-0.273228403958663	0.534612313634079
bio02	-0.075294474782867	1	0.0865852690551122	0.455632295253439	0.584912152482374	-0.367578015868249	0.602886934738815	0.151037437402226	-0.0728003974310934	0.324444172848363	-0.290947569323466	-0.396254685445757	-0.27516328711959	-0.410110715324828	0.290402144314807	-0.313189755293233	-0.398676928928982	-0.267002042932006	-0.391949281984265
bio03	0.690888888056867	0.0865852690551122	1	-0.81047986279398	0.0433685288096346	0.781257769958245	-0.714447990219354	-0.398998978729275	0.659193069606379	0.101021055529237	0.806555604004242	0.42165345815748	0.409153637434896	0.251498705499365	0.0017805537073673	0.416350221799463	0.294391345454636	-0.0730009097021675	0.534203508387013
bio04	-0.66388191509425	0.455632295253439	-0.81047986279398	1	0.284352015325891	-0.911926249570949	0.981553993203528	0.444501472656483	-0.631475261778221	0.102631589754106	-0.895784095184226	-0.590646106304229	-0.518943395309547	-0.458231961721617	0.14787601392664	-0.545294268985783	-0.48456300955489	-0.124655832244828	-0.641433398728161
bio05	0.500711652136399	0.584912152482374	0.0433685288096346	0.284352015325891	1	0.0916065814867784	0.354652428036781	0.205830326115711	0.378530193028602	0.946842538652227	0.152148960460059	-0.33767814137701	-0.210276237599149	-0.432415626159796	0.244920411728181	-0.254435619563173	-0.392208432591771	-0.528578534903385	-0.0892043964397477
bio06	0.901670605068191	-0.367578015868249	0.781257769958245	-0.911926249570949	0.0916065814867784	1	-0.898578306599384	-0.340725675214069	0.799279098101819	0.303035448684051	0.99514058362738	0.48640926485403	0.44886471907548	0.327533019073165	-0.0976131745158065	0.461924898009991	0.36806040813523	-0.0721585639135324	0.656366776504374
bio07	-0.625973564542339	0.602886934738815	-0.714447990219354	0.981553993203528	0.354652428036781	-0.898578306599384	1	0.410625528015485	-0.583674670936503	0.132707402213208	-0.867336603062101	-0.605515443906834	-0.51412143686432	-0.498086789684253	0.199581639325104	-0.545843784315028	-0.518421882011009	-0.165173620890135	-0.655602455491493
bio08	-0.194842531566941	0.151037437402226	-0.398998978729275	0.444501472656483	0.205830326115711	-0.340725675214069	0.410625528015485	1	-0.446264807279921	0.164842434272191	-0.348920821565228	-0.286664548923541	-0.274975056797249	-0.19277175634904	-0.0446827996636873	-0.277288711250663	-0.197138520449548	0.186534734140242	-0.434180339160073
bio09	0.842917177479109	-0.0728003974310934	0.659193069606379	-0.631475261778221	0.378530193028602	0.799279098101819	-0.583674670936503	-0.446264807279921	1	0.50808021973519	0.822913306193459	0.31457611492259	0.334610400724627	0.115502230951075	0.0649014169094682	0.325727391837948	0.168392893234131	-0.36540966007432	0.619834179589906
bio10	0.673022840627907	0.324444172848363	0.101021055529237	0.102631589754106	0.946842538652227	0.303035448684051	0.132707402213208	0.164842434272191	0.50808021973519	1	0.349323514102963	-0.20746232238816	-0.100240934463911	-0.323859841099598	0.1890692348742	-0.136255407406882	-0.279332762540061	-0.504534068964257	0.083800130960378
bio11	0.925427496054521	-0.290947569323466	0.806555604004242	-0.895784095184226	0.152148960460059	0.99514058362738	-0.867336603062101	-0.348920821565228	0.822913306193459	0.349323514102963	1	0.467346492630563	0.445459750367636	0.292558467570323	-0.0600734908282292	0.454059599567579	0.337261282760014	-0.108072216920903	0.647212634473064
bio12	0.286121400193309	-0.396254685445757	0.42165345815748	-0.590646106304229	-0.33767814137701	0.48640926485403	-0.605515443906834	-0.286664548923541	0.31457611492259	-0.20746232238816	0.467346492630563	1	0.888193943661769	0.803342836798981	-0.21208069733416	0.91802516076079	0.849995968846978	0.627343639725812	0.837390869302166
bio13	0.312304392166183	-0.27516328711959	0.409153637434896	-0.518943395309547	-0.210276237599149	0.44886471907548	-0.51412143686432	-0.274975056797249	0.334610400724627	-0.100240934463911	0.445459750367636	0.888193943661769	1	0.504782490473587	0.214068853392747	0.989558382773026	0.559608828593397	0.468084957098798	0.815073570475919
bio14	0.105115927106626	-0.410110715324828	0.251498705499365	-0.458231961721617	-0.432415626159796	0.327533019073165	-0.498086789684253	-0.19277175634904	0.115502230951075	-0.323859841099598	0.292558467570323	0.803342836798981	0.504782490473587	1	-0.646283585867602	0.550303987124322	0.987143452449729	0.725596266229304	0.530436333625805
bio15	0.0289764252123883	0.290402144314807	0.0017805537073673	0.14787601392664	0.244920411728181	-0.0976131745158065	0.199581639325104	-0.0446827996636873	0.0649014169094682	0.1890692348742	-0.0600734908282292	-0.21208069733416	0.214068853392747	-0.646283585867602	1	0.162267515298533	-0.626364966009151	-0.351237888216991	-0.0246090756476567
bio16	0.305291239103172	-0.313189755293233	0.416350221799463	-0.545294268985783	-0.254435619563173	0.461924898009991	-0.545843784315028	-0.277288711250663	0.325727391837948	-0.136255407406882	0.454059599567579	0.91802516076079	0.989558382773026	0.550303987124322	0.162267515298533	1	0.601250036104102	0.507043665405739	0.828071487210125
bio17	0.157137187001719	-0.398676928928982	0.294391345454636	-0.48456300955489	-0.392208432591771	0.36806040813523	-0.518421882011009	-0.197138520449548	0.168392893234131	-0.279332762540061	0.337261282760014	0.849995968846978	0.559608828593397	0.987143452449729	-0.626364966009151	0.601250036104102	1	0.711833844582378	0.592910296220239
bio18	-0.273228403958663	-0.267002042932006	-0.0730009097021675	-0.124655832244828	-0.528578534903385	-0.0721585639135324	-0.165173620890135	0.186534734140242	-0.36540966007432	-0.504534068964257	-0.108072216920903	0.627343639725812	0.468084957098798	0.725596266229304	-0.351237888216991	0.507043665405739	0.711833844582378	1	0.146080566939445
bio19	0.534612313634079	-0.391949281984265	0.534203508387013	-0.641433398728161	-0.0892043964397477	0.656366776504374	-0.655602455491493	-0.434180339160073	0.619834179589906	0.083800130960378	0.647212634473064	0.837390869302166	0.815073570475919	0.530436333625805	-0.0246090756476567	0.828071487210125	0.592910296220239	0.146080566939445	1
Pearson correlation for Lygocoris pabulinus
	bio01	bio02	bio03	bio04	bio05	bio06	bio07	bio08	bio09	bio10	bio11	bio12	bio13	bio14	bio15	bio16	bio17	bio18	bio19
bio01	1	-0.528824878853558	0.629278700108114	-0.818769050044572	0.25571927714454	0.936208787161472	-0.816677179197834	0.0167709606396846	0.867916783416639	0.545305122239026	0.951648952784059	0.330106227548144	0.088004119221584	0.514009293735934	-0.520737329680722	0.11148436824937	0.510797589343961	0.0304228233807284	0.531342703550662
bio02	-0.528824878853558	1	-0.104500688487851	0.674161613830226	0.384484192228847	-0.685977604189859	0.751415979849907	0.32034809799542	-0.65986876241226	0.0350129568319788	-0.642074059337207	-0.287428710904	0.147096686000486	-0.595431420359213	0.760675097573537	0.0840346411124365	-0.60924268393303	0.15693218559308	-0.650490918187066
bio03	0.629278700108114	-0.104500688487851	1	-0.753814585320066	-0.128602435799012	0.702877153564331	-0.698922150118735	-0.40127149446609	0.689759117485046	-0.0276553820467586	0.719257537560991	0.291599369452361	0.044531945418034	0.523206197198127	-0.367226559635206	0.0856666630802431	0.499059030279792	-0.0183337362707659	0.532467239321131
bio04	-0.818769050044572	0.674161613830226	-0.753814585320066	1	0.31723677062595	-0.959063821221957	0.991600820784546	0.415029978720077	-0.896162166645761	0.0307759163478461	-0.954361799215564	-0.436560414995536	-0.0171956697397546	-0.73380487216416	0.69721684926179	-0.0804270763397286	-0.729503252801153	0.0230208633431866	-0.744925437750972
bio05	0.25571927714454	0.384484192228847	-0.128602435799012	0.31723677062595	1	-0.0683639560294156	0.332220248660314	0.70334173603063	-0.0617604549868301	0.913575433421142	-0.0341190599742679	-0.248889447112511	0.0473331670275561	-0.397276004820267	0.288226116920273	-0.0204231112209669	-0.400456655539575	0.0224760297532414	-0.394007626413526
bio06	0.936208787161472	-0.685977604189859	0.702877153564331	-0.959063821221957	-0.0683639560294156	1	-0.963707058293773	-0.24227605016007	0.940779611224868	0.23779934632572	0.996165628894305	0.379306989006154	-0.00304996458995806	0.67822907802607	-0.697665153549944	0.0477845904217557	0.673405220363608	-0.0500876928399514	0.69953498744342
bio07	-0.816677179197834	0.751415979849907	-0.698922150118735	0.991600820784546	0.332220248660314	-0.963707058293773	1	0.417256921698322	-0.905952274660544	0.01964309422775	-0.950918467140438	-0.425201853754318	0.0155492671371794	-0.747513353121283	0.736708040250894	-0.0506411856579986	-0.743803916144827	0.0533679066195779	-0.766781672455688
bio08	0.0167709606396846	0.32034809799542	-0.40127149446609	0.415029978720077	0.70334173603063	-0.24227605016007	0.417256921698322	1	-0.349632353673383	0.635594023511898	-0.213425978063281	-0.174615361367582	0.178424790879138	-0.472808604292872	0.418201290915795	0.118978229999068	-0.477537320432075	0.244227770071282	-0.572906994327919
bio09	0.867916783416639	-0.65986876241226	0.689759117485046	-0.896162166645761	-0.0617604549868301	0.940779611224868	-0.905952274660544	-0.349632353673383	1	0.219309014485562	0.931206834933977	0.344637620191719	-0.0562077366380266	0.681976424181809	-0.708716598389515	-0.00632863380390919	0.683937454234457	-0.133546396367406	0.770493874837708
bio10	0.545305122239026	0.0350129568319788	-0.0276553820467586	0.0307759163478461	0.913575433421142	0.23779934632572	0.01964309422775	0.635594023511898	0.219309014485562	1	0.268265286925822	-0.0741182650229266	0.109644324219151	-0.17728114854165	0.0869077393344413	0.0578324465635377	-0.175381425243786	0.0667313143172862	-0.154986687089948
bio11	0.951648952784059	-0.642074059337207	0.719257537560991	-0.954361799215564	-0.0341190599742679	0.996165628894305	-0.950918467140438	-0.213425978063281	0.931206834933977	0.268265286925822	1	0.398872249502836	0.0458143821821547	0.657974458719454	-0.65173346907607	0.0920798297548089	0.654135134357797	-0.005641358240597	0.675878394822787
bio12	0.330106227548144	-0.287428710904	0.291599369452361	-0.436560414995536	-0.248889447112511	0.379306989006154	-0.425201853754318	-0.174615361367582	0.344637620191719	-0.0741182650229266	0.398872249502836	1	0.794504977000674	0.683979433138701	-0.146397107134656	0.858099600769725	0.709066460534829	0.792220171649603	0.616222982596597
bio13	0.088004119221584	0.147096686000486	0.044531945418034	-0.0171956697397546	0.0473331670275561	-0.00304996458995806	0.0155492671371794	0.178424790879138	-0.0562077366380266	0.109644324219151	0.0458143821821547	0.794504977000674	1	0.163225662826315	0.410343069142501	0.986809481613314	0.190563476872817	0.963663943678138	0.103367804171613
bio14	0.514009293735934	-0.595431420359213	0.523206197198127	-0.73380487216416	-0.397276004820267	0.67822907802607	-0.747513353121283	-0.472808604292872	0.681976424181809	-0.17728114854165	0.657974458719454	0.683979433138701	0.163225662826315	1	-0.712966512627962	0.249332769433503	0.992538511490217	0.178834339695566	0.910074126739155
bio15	-0.520737329680722	0.760675097573537	-0.367226559635206	0.69721684926179	0.288226116920273	-0.697665153549944	0.736708040250894	0.418201290915795	-0.708716598389515	0.0869077393344413	-0.65173346907607	-0.146397107134656	0.410343069142501	-0.712966512627962	1	0.337753031032815	-0.707527679433365	0.387838809005549	-0.698104715396085
bio16	0.11148436824937	0.0840346411124365	0.0856666630802431	-0.0804270763397286	-0.0204231112209669	0.0477845904217557	-0.0506411856579986	0.118978229999068	-0.00632863380390919	0.0578324465635377	0.0920798297548089	0.858099600769725	0.986809481613314	0.249332769433503	0.337753031032815	1	0.274542548096782	0.970018727357742	0.183976626956746
bio17	0.510797589343961	-0.60924268393303	0.499059030279792	-0.729503252801153	-0.400456655539575	0.673405220363608	-0.743803916144827	-0.477537320432075	0.683937454234457	-0.175381425243786	0.654135134357797	0.709066460534829	0.190563476872817	0.992538511490217	-0.707527679433365	0.274542548096782	1	0.198715575484404	0.920468966365532
bio18	0.0304228233807284	0.15693218559308	-0.0183337362707659	0.0230208633431866	0.0224760297532414	-0.0500876928399514	0.0533679066195779	0.244227770071282	-0.133546396367406	0.0667313143172862	-0.005641358240597	0.792220171649603	0.963663943678138	0.178834339695566	0.387838809005549	0.970018727357742	0.198715575484404	1	0.0376896001003277
bio19	0.531342703550662	-0.650490918187066	0.532467239321131	-0.744925437750972	-0.394007626413526	0.69953498744342	-0.766781672455688	-0.572906994327919	0.770493874837708	-0.154986687089948	0.675878394822787	0.616222982596597	0.103367804171613	0.910074126739155	-0.698104715396085	0.183976626956746	0.920468966365532	0.0376896001003277	1
Pearson correlation for L. punctatus
	bio01	bio02	bio03	bio04	bio05	bio06	bio07	bio08	bio09	bio10	bio11	bio12	bio13	bio14	bio15	bio16	bio17	bio18	bio19
bio01	1	-0.492734005480337	0.568195916183307	-0.883100850688987	-2.3448628840989e-05	0.935411738302815	-0.853926761176582	0.00226631861216064	0.890909207343847	0.412320443138984	0.959709486135255	0.489251564989705	0.108099550169099	0.561263462788441	-0.436273864518675	0.159356989881879	0.563750861143207	0.0522387345147722	0.567170900017339
bio02	-0.492734005480337	1	0.281143828521311	0.699690052735904	0.606808491274879	-0.723623824827386	0.792323279607799	0.500506614480666	-0.619148393741453	0.262572873672363	-0.647827140038925	-0.664600772860758	0.0829690206268635	-0.87674941263191	0.822231570478951	-0.0649622525816078	-0.878911192277074	0.0963332387621188	-0.850053422503093
bio03	0.568195916183307	0.281143828521311	1	-0.459670179689832	0.164367306976443	0.419945554785506	-0.34767680147776	0.130664298151756	0.414635500413024	0.264052900001615	0.501616345418084	0.0719424084164882	0.246835161672628	-0.0224479512676492	0.217586769547913	0.199260645101031	-0.0387786317832878	0.191503402772496	-0.00865207180422379
bio04	-0.883100850688987	0.699690052735904	-0.459670179689832	1	0.438533493649843	-0.977370497089967	0.987431544864624	0.342103016558797	-0.866749678404433	0.0537460124730145	-0.977682672488999	-0.661134512742205	-0.130863268425844	-0.771170902917256	0.589360638122733	-0.221738997103742	-0.765348439426553	-0.091015381808747	-0.749687351636489
bio05	-2.3448628840989e-05	0.606808491274879	0.164367306976443	0.438533493649843	1	-0.301508315127405	0.492343717771104	0.772620357058783	-0.134587575961732	0.87963560312817	-0.254636874621828	-0.597612599470979	-0.229390676456987	-0.626037785201761	0.371362221915566	-0.33424082817024	-0.609480684091951	-0.224114965344929	-0.57107647468158
bio06	0.935411738302815	-0.723623824827386	0.419945554785506	-0.977370497089967	-0.301508315127405	1	-0.978341219852743	-0.244243993427758	0.913774724127833	0.11164961495528	0.992661534756656	0.624597455839239	0.0571413805872486	0.76341546897609	-0.629575891849363	0.150281217503737	0.761406441148958	0.012577423866689	0.752016878934829
bio07	-0.853926761176582	0.792323279607799	-0.34767680147776	0.987431544864624	0.492343717771104	-0.978341219852743	1	0.390703541277901	-0.86338881375134	0.0890474483419502	-0.961466182205211	-0.699927324976841	-0.101964544690794	-0.832823118531522	0.655352682539997	-0.209753498779755	-0.827394533657015	-0.0601374902391159	-0.810485335466101
bio08	0.00226631861216064	0.500506614480666	0.130664298151756	0.342103016558797	0.772620357058783	-0.244243993427758	0.390703541277901	1	-0.255204037023194	0.678044362945305	-0.202672890915588	-0.456083360925146	-0.0534410098617663	-0.524508171873018	0.373639982347179	-0.164541986520073	-0.515311135411958	0.0304724469926589	-0.528459049212768
bio09	0.890909207343847	-0.619148393741453	0.414635500413024	-0.866749678404433	-0.134587575961732	0.913774724127833	-0.86338881375134	-0.255204037023194	1	0.246384668894699	0.911186507586498	0.492751929876984	-0.039703195560899	0.656567791904865	-0.581268800760739	0.0401002705325471	0.654139292810413	-0.125458008327814	0.684082269553599
bio10	0.412320443138984	0.262572873672363	0.264052900001615	0.0537460124730145	0.87963560312817	0.11164961495528	0.0890474483419502	0.678044362945305	0.246384668894699	1	0.154959958914631	-0.281316008785664	-0.123032846394808	-0.291715868344184	0.15083938435977	-0.18253348882489	-0.273676243247353	-0.152749777833041	-0.236328406015272
bio11	0.959709486135255	-0.647827140038925	0.501616345418084	-0.977682672488999	-0.254636874621828	0.992661534756656	-0.961466182205211	-0.202672890915588	0.911186507586498	0.154959958914631	1	0.604021417772823	0.104101253523829	0.711918675509904	-0.560181349417016	0.183424956506392	0.709819080126635	0.0566861354920486	0.702293400447329
bio12	0.489251564989705	-0.664600772860758	0.0719424084164882	-0.661134512742205	-0.597612599470979	0.624597455839239	-0.699927324976841	-0.456083360925146	0.492751929876984	-0.281316008785664	0.604021417772823	1	0.580396737614377	0.838318187961206	-0.474106950353183	0.712782107013356	0.846705701487002	0.529259537278428	0.833977584134025
bio13	0.108099550169099	0.0829690206268635	0.246835161672628	-0.130863268425844	-0.229390676456987	0.0571413805872486	-0.101964544690794	-0.0534410098617663	-0.039703195560899	-0.123032846394808	0.104101253523829	0.580396737614377	1	0.0869062612171738	0.386332800417769	0.971235621307515	0.0981060948257392	0.955188933994328	0.0929462309937965
bio14	0.561263462788441	-0.87674941263191	-0.0224479512676492	-0.771170902917256	-0.626037785201761	0.76341546897609	-0.832823118531522	-0.524508171873018	0.656567791904865	-0.291715868344184	0.711918675509904	0.838318187961206	0.0869062612171738	1	-0.80372765450435	0.242128362565822	0.996077537970921	0.0271578631677879	0.983642328552724
bio15	-0.436273864518675	0.822231570478951	0.217586769547913	0.589360638122733	0.371362221915566	-0.629575891849363	0.655352682539997	0.373639982347179	-0.581268800760739	0.15083938435977	-0.560181349417016	-0.474106950353183	0.386332800417769	-0.80372765450435	1	0.25041308425392	-0.809506354579187	0.379795958913387	-0.778652201830335
bio16	0.159356989881879	-0.0649622525816078	0.199260645101031	-0.221738997103742	-0.33424082817024	0.150281217503737	-0.209753498779755	-0.164541986520073	0.0401002705325471	-0.18253348882489	0.183424956506392	0.712782107013356	0.971235621307515	0.242128362565822	0.25041308425392	1	0.250410128739558	0.939100865088156	0.245136080537546
bio17	0.563750861143207	-0.878911192277074	-0.0387786317832878	-0.765348439426553	-0.609480684091951	0.761406441148958	-0.827394533657015	-0.515311135411958	0.654139292810413	-0.273676243247353	0.709819080126635	0.846705701487002	0.0981060948257392	0.996077537970921	-0.809506354579187	0.250410128739558	1	0.0391842947103147	0.985622713631855
bio18	0.0522387345147722	0.0963332387621188	0.191503402772496	-0.091015381808747	-0.224114965344929	0.012577423866689	-0.0601374902391159	0.0304724469926589	-0.125458008327814	-0.152749777833041	0.0566861354920486	0.529259537278428	0.955188933994328	0.0271578631677879	0.379795958913387	0.939100865088156	0.0391842947103147	1	-0.000124241428321101
bio19	0.567170900017339	-0.850053422503093	-0.00865207180422379	-0.749687351636489	-0.57107647468158	0.752016878934829	-0.810485335466101	-0.528459049212768	0.684082269553599	-0.236328406015272	0.702293400447329	0.833977584134025	0.0929462309937965	0.983642328552724	-0.778652201830335	0.245136080537546	0.985622713631855	-0.000124241428321101	1

## Sheet: Data SI3 areas
Data SI3. Areas calculated from the geographic projections of the ecological niche models for each species, dataset and climate model, km2
Entire area				Entire polar area				Europen area				European polar area				Asian area				Asian polar area
	Lygocoris pabulinus	Liocoris tripustulatus	Lygus punctatu		Lygocoris pabulinus	Liocoris tripustulatus	Lygus punctatu		Lygocoris pabulinus	Liocoris tripustulatus	Lygus punctatu		Lygocoris pabulinus	Liocoris tripustulatus	Lygus punctatu		Lygocoris pabulinus	Liocoris tripustulatus	Lygus punctatu		Lygocoris pabulinus	Liocoris tripustulatus	Lygus punctatu
current	15028400	10465400	14356100	current	775420	44557	238924	current	6651790	9451770	3753900	current	631402	44557	238924	current	8376610	1013630	10602200	current	144018	0	0
Last interglacial	12089900	6356220	19790400	Last interglacial	1762460	35677	1409350	Last interglacial	4421390	5957060	4642500	Last interglacial	494532	35677	323607	Last interglacial	7668510	399160	15147900	Last interglacial	1267928	0	1085743
CCSM4				CCSM4				CCSM4				CCSM4				CCSM4				CCSM4		0
Middle of Holocene	10510800	9718750	12270600	Middle of Holocene	318587	16322	147354	Middle of Holocene	3449730	9029550	3070640	Middle of Holocene	188329	16322	147354	Middle of Holocene	7061070	689200	9199960	Middle of Holocene	130258	0	0
LGM	11050900	4004560	4861470	LGM	649	0	0	LGM	4793260	3504570	1278850	LGM	649	0	0	LGM	6257640	499990	3582620	LGM	0	0	0
Future 2070 26	13890200	10934400	12910000	Future 2070 26	1004130	149865	585837	Future 2070 26	4361710	9636850	2224950	Future 2070 26	537115	149865	330604	Future 2070 26	9528490	1297550	10685050	Future 2070 26	467015	0	255233
Future 2070 85	10963400	12283200	12742500	Future 2070 85	1350260	514769	2393030	Future 2070 85	2447720	10048700	1199200	Future 2070 85	668563	486448	505775	Future 2070 85	8515680	2234500	11543300	Future 2070 85	681697	28321	1887255
MIROC ESM				MIROC ESM				MIROC ESM				MIROC ESM				MIROC ESM				MIROC ESM
Middle of Holocene	12324200	8440360	12650700	Middle of Holocene	1102400	20046	212158	Middle of Holocene	4456150	8120190	2755710	Middle of Holocene	615980	20046	212007	Middle of Holocene	7868050	320170	9894990	Middle of Holocene	486420	0	151
LGM	10614500	3218720	1866560	LGM	6178	0	0	LGM	4714780	2667920	1057150	LGM	0	0	0	LGM	5899720	550800	809410	LGM	6178	0	0
Future 2070 26	16192400	11360400	16272800	Future 2070 26	1828360	450305	1781550	Future 2070 26	4357040	9956970	1621500	Future 2070 26	533693	259490	225552	Future 2070 26	11835360	1403430	14651300	Future 2070 26	1294667	190815	1555998
Future 2070 85	12209100	12975400	10615800	Future 2070 85	2333120	1041620	2059860	Future 2070 85	2167450	8486190	371612	Future 2070 85	770220	626911	215217	Future 2070 85	10041650	4489210	10244188	Future 2070 85	1562900	414709	1844643
MPI-ESM				MPI-ESM				MPI-ESM				MPI-ESM				MPI-ESM				MPI-ESM
Middle of Holocene	14009700	8814050	17746600	Middle of Holocene	479571	18530	389850	Middle of Holocene	6054170	8352750	4067110	Middle of Holocene	361186	18530	238282	Middle of Holocene	7955530	461300	13679490	Middle of Holocene	118385	0	151568
LGM	11576600	5697440	7174130	LGM	15965	0	0	LGM	4909110	4303240	1969070	LGM	15965	0	0	LGM	6667490	1394200	5205060	LGM	0	0	0
Future 2070 26	13597800	12275300	14071900	Future 2070 26	2234300	259490	533288	Future 2070 26	4814620	9956970	2548420	Future 2070 26	587295	259490	267644	Future 2070 26	8783180	2318330	11523480	Future 2070 26	1647005	0	265644
Future 2070 85	12598100	11566700	12868400	Future 2070 85	1806000	547787	1446830	Future 2070 85	3371760	8699340	1520130	Future 2070 85	592947	529713	412877	Future 2070 85	9226340	2867360	11348270	Future 2070 85	1213053	18074	1033953
				Entire polar region/entire area ratio				European area /entire area ratio				European polar area/Europe area ratio				European area/Asia area ratio				Asian polar area/Asia area ratio
					Lygocoris pabulinus	Liocoris tripustulatus	Lygus punctatu		Lygocoris pabulinus	Liocoris tripustulatus	Lygus punctatu		Lygocoris pabulinus	Liocoris tripustulatus	Lygus punctatu		Lygocoris pabulinus	Liocoris tripustulatus	Lygus punctatu	Lygocoris pabulinus	Liocoris tripustulatus	Lygus punctatu
				current	0.051597	0.00425755	0.0166427	current	0.442615	0.903145	0.261485	current	0.0949221	0.00471414	0.0636469	current	0.794091	9.32467	0.354068	current	0.0171929	0	0
				Last interglacial	0.14578	0.00561293	0.0712138	Last interglacial	0.365709	0.937202	0.234583	Last interglacial	0.11185	0.00598903	0.0697053	Last interglacial	0.576564	14.924	0.306478	Last interglacial	0.165342	0	0.0716761
				CCSM4				CCSM4				CCSM4				CCSM4				CCSM4
				Middle of Holocene	0.0303104	0.00167943	0.0120087	Middle of Holocene	0.328208	0.929086	0.250244	Middle of Holocene	0.0545924	0.00180762	0.047988	Middle of Holocene	0.488556	13.1015	0.333767	Middle of Holocene	0.0184473	0	0
				LGM	5.87282e-05	0	0	LGM	0.433744	0.875145	0.263058	LGM	0.000135398	0	0	LGM	0.765985	7.00928	0.356959	LGM	0	0	0
				Future 2070 26	0.0722905	0.0137058	0.0453785	Future 2070 26	0.314013	0.881333	0.172343	Future 2070 26	0.123143	0.0155512	0.148589	Future 2070 26	0.457755	7.42696	0.20823	Future 2070 26	0.0490125	0	0.0238869
				Future 2070 85	0.123161	0.0419084	0.187799	Future 2070 85	0.223263	0.818085	0.0941103	Future 2070 85	0.273137	0.048409	0.42176	Future 2070 85	0.287437	4.49707	0.103887	Future 2070 85	0.080052	0.0126744	0.163494
				MIROC ESM				MIROC ESM				MIROC ESM				MIROC ESM				MIROC ESM
				Middle of Holocene	0.08945	0.00237502	0.0167705	Middle of Holocene	0.361577	0.962067	0.217831	Middle of Holocene	0.138231	0.00246866	0.0769337	Middle of Holocene	0.56636	25.3621	0.278495	Middle of Holocene	0.0618222	0	1.52602e-05
				LGM	0.000582034	0	0	LGM	0.444183	0.828876	0.566363	LGM	0	0	0	LGM	0.799153	4.84372	1.30607	LGM	0.00104717	0	0
				Future 2070 26	0.112915	0.0396381	0.10948	Future 2070 26	0.269079	0.876463	0.0996448	Future 2070 26	0.12249	0.0260611	0.139101	Future 2070 26	0.368138	7.09474	0.110673	Future 2070 26	0.10939	0.135963	0.106202
				Future 2070 85	0.191097	0.0802765	0.194037	Future 2070 85	0.177527	0.654021	0.0350056	Future 2070 85	0.355358	0.0738743	0.579144	Future 2070 85	0.215846	1.89035	0.0362754	Future 2070 85	0.155642	0.0923791	0.180067
				MPI-ESM				MPI-ESM				MPI-ESM				MPI-ESM				MPI-ESM
				Middle of Holocene	0.0342314	0.00210233	0.0219676	Middle of Holocene	0.432141	0.947663	0.229177	Middle of Holocene	0.059659	0.00221843	0.0585875	Middle of Holocene	0.761001	18.107	0.297314	Middle of Holocene	0.0148808	0	0.0110799
				LGM	0.00137908	0	0	LGM	0.424055	0.755294	0.274468	LGM	0.00325212	0	0	LGM	0.736276	3.08653	0.378299	LGM	0	0	0
				Future 2070 26	0.164313	0.0211392	0.0378974	Future 2070 26	0.354073	0.811139	0.1811	Future 2070 26	0.121982	0.0260611	0.105024	Future 2070 26	0.548164	4.29489	0.22115	Future 2070 26	0.187518	0	0.0230524
				Future 2070 85	0.143355	0.047359	0.112433	Future 2070 85	0.26764	0.752102	0.118129	Future 2070 85	0.175857	0.0608912	0.271606	Future 2070 85	0.365449	3.03392	0.133953	Future 2070 85	0.131477	0.00630336	0.0911111
